# Supplementary material for: Essential Oil Blends: The Potential of Combined Use for Respiratory Tract Infections
Source: MDPI journal article supplement (doi:10.3390/antibiotics10121517), 2021-12-10
Supplement: s1 [file s1]

**Table S1.** The mean MIC (n = 3) and  $\Sigma$ FIC values of the essential oil combinations investigated against pathogens of the respiratory tract

| Essential oil combinations<br>(common name in brackets) |                               | Mean MIC value (mg/mL) (n = 3) and ΣFIC      |       |                                                 |       |                                                 |       |                                               |       |                                                |        |                                               |       |                                              |       |                                              |       |                                                |       |
|---------------------------------------------------------|-------------------------------|----------------------------------------------|-------|-------------------------------------------------|-------|-------------------------------------------------|-------|-----------------------------------------------|-------|------------------------------------------------|--------|-----------------------------------------------|-------|----------------------------------------------|-------|----------------------------------------------|-------|------------------------------------------------|-------|
|                                                         |                               | <i>Staphylococcus aureus</i><br>(ATCC 25924) |       | <i>Streptococcus agalactiae</i><br>(ATCC 55618) |       | <i>Streptococcus pneumoniae</i><br>(ATCC 49619) |       | <i>Streptococcus pyogenes</i><br>(ATCC 12344) |       | <i>Mycobacterium smegmatis</i><br>(ATCC 19420) |        | <i>Haemophilus influenzae</i><br>(ATCC 19418) |       | <i>Klebsiella pneumoniae</i><br>(ATCC 13883) |       | <i>Moraxella catarrhalis</i><br>(ATCC 23246) |       | <i>Cryptococcus neoformans</i><br>(ATCC 14116) |       |
| Essential oil 1                                         | Essential oil 2               | MIC*                                         | ΣFIC* | MIC*                                            | ΣFIC* | MIC*                                            | ΣFIC* | MIC*                                          | ΣFIC* | MIC*                                           | ΣFIC** | MIC*                                          | ΣFIC* | MIC*                                         | ΣFIC* | MIC*                                         | ΣFIC* | MIC*                                           | ΣFIC* |
| <i>Abies balsamea</i><br>(fir)                          | <i>Boswellia carterii</i>     | 2.00                                         | 0.63  | 2.00                                            | 1.00  | 4.00                                            | 4.00  | 3.00                                          | 1.25  | 2.00                                           | 0.83   | 4.00                                          | 5.33  | 0.75                                         | 0.56  | 2.00                                         | 1.00  | 0.25                                           | 0.16  |
|                                                         | <i>Carum carvi</i>            | 2.00                                         | 1.00  | 2.00                                            | 1.00  | 2.00                                            | 1.50  | 8.00                                          | 3.33  | 2.00                                           | 0.75   | 4.00                                          | 2.67  | 3.00                                         | 2.25  | 2.00                                         | 1.00  | 0.75                                           | 0.84  |
|                                                         | <i>Juniperus virginiana</i>   | 2.00                                         | 2.50  | 1.00                                            | 0.75  | 2.00                                            | 1.50  | 0.19                                          | 0.53  | 1.50                                           | 0.75   | 6.00                                          | 8.00  | 1.00                                         | 0.75  | 2.00                                         | 1.50  | 0.25                                           | 0.28  |
|                                                         | <i>Lavandula angustifolia</i> | 3.00                                         | 2.25  | 2.00                                            | 1.00  | 4.00                                            | 4.00  | 8.00                                          | 2.33  | 1.00                                           | 0.50   | 4.00                                          | 2.00  | 1.00                                         | 0.83  | 6.00                                         | 3.00  | 0.25                                           | 0.16  |
|                                                         | <i>Melaleuca viridiflora</i>  | 2.00                                         | 0.75  | 2.00                                            | 1.00  | 4.00                                            | 4.00  | 1.00                                          | 0.67  | 2.00                                           | 0.75   | 3.00                                          | 1.19  | 0.75                                         | 0.56  | 2.00                                         | 1.00  | 0.75                                           | 1.59  |
|                                                         | <i>Myrtus communis</i>        | 3.00                                         | 1.13  | 4.00                                            | 2.00  | 4.00                                            | 3.00  | 8.00                                          | 1.83  | 1.50                                           | 0.50   | 3.00                                          | 1.25  | 1.00                                         | 0.75  | 4.00                                         | 2.00  | 0.25                                           | 0.09  |
|                                                         | <i>Ocimum basilicum</i>       | 1.00                                         | 1.25  | 2.00                                            | 1.50  | 2.00                                            | 1.50  | 6.00                                          | 3.00  | 3.00                                           | 1.13   | 4.00                                          | 1.67  | 1.00                                         | 1.00  | 2.00                                         | 1.50  | 0.38                                           | 0.80  |
| <i>Amyris balsamifera</i><br>(amyris)                   | <i>Boswellia carterii</i>     | 0.75                                         | 0.80  | 0.50                                            | 0.63  | 6.00                                            | 27.00 | 0.38                                          | 0.59  | 0.75                                           | 0.50   | 0.75                                          | 3.75  | 1.00                                         | 0.50  | 1.00                                         | 0.75  | 1.00                                           | 1.50  |
|                                                         | <i>Canarium luzonicum</i>     | 0.50                                         | 0.63  | 0.50                                            | 0.63  | 3.00                                            | 12.75 | 0.50                                          | 0.83  | 0.75                                           | 0.47   | 0.50                                          | 2.08  | 1.00                                         | 0.50  | 2.00                                         | 1.50  | 1.00                                           | 2.00  |
|                                                         | <i>Ferula galbaniflua</i>     | 1.00                                         | 1.17  | 0.50                                            | 0.63  | 4.00                                            | 17.00 | 0.38                                          | 0.63  | 0.75                                           | 0.44   | 1.50                                          | 6.09  | 1.50                                         | 0.75  | 1.00                                         | 0.75  | 2.00                                           | 4.67  |
|                                                         | <i>Lavandula angustifolia</i> | 0.75                                         | 1.13  | 0.50                                            | 0.63  | 1.00                                            | 4.50  | 0.75                                          | 1.09  | 0.50                                           | 0.38   | 1.00                                          | 4.17  | 1.00                                         | 0.58  | 1.00                                         | 0.75  | 1.50                                           | 2.25  |
|                                                         | <i>Salvia officinalis</i>     | 0.75                                         | 1.00  | 0.25                                            | 0.31  | 0.50                                            | 2.13  | 0.38                                          | 0.69  | 0.75                                           | 0.47   | 1.00                                          | 4.17  | 2.00                                         | 1.50  | 1.00                                         | 0.75  | 0.25                                           | 1.25  |
|                                                         | <i>Styrax benzoin</i>         | 0.25                                         | 0.28  | 0.25                                            | 0.31  | 0.75                                            | 3.09  | 0.19                                          | 0.31  | 2.00                                           | 1.25   | 0.13                                          | 0.53  | 1.50                                         | 0.75  | 0.50                                         | 0.38  | 0.50                                           | 1.17  |
| <i>Boswellia carterii</i><br>(frankincense)             | <i>Cinnamomum zeylanicum</i>  | 1.00                                         | 0.56  | 1.00                                            | 1.25  | 2.00                                            | 1.50  | 0.25                                          | 0.56  | 1.50                                           | 0.63   | 3.00                                          | 5.00  | 1.00                                         | 0.75  | 2.00                                         | 2.50  | 0.13                                           | 0.15  |
|                                                         | <i>Citrus bergamia</i>        | 2.00                                         | 0.25  | 4.00                                            | 2.00  | 4.00                                            | 3.00  | 3.00                                          | 1.25  | 1.50                                           | 0.44   | 6.00                                          | 7.00  | 2.00                                         | 0.83  | 4.00                                         | 1.25  | 0.25                                           | 0.25  |
|                                                         | <i>Citrus limon</i>           | 4.00                                         | 0.50  | 2.00                                            | 1.00  | 4.00                                            | 3.00  | 8.00                                          | 4.00  | 2.00                                           | 0.58   | 2.00                                          | 2.13  | 4.00                                         | 1.67  | 2.00                                         | 1.50  | 0.13                                           | 0.10  |
|                                                         | <i>Citrus sinensis</i>        | 3.00                                         | 0.38  | 4.00                                            | 2.00  | 4.00                                            | 3.00  | 8.00                                          | 6.00  | 2.00                                           | 0.58   | 8.00                                          | 8.50  | 2.00                                         | 1.00  | 2.00                                         | 0.83  | 0.13                                           | 0.13  |
|                                                         | <i>Commiphora molmol</i>      | 2.00                                         | 0.38  | 2.00                                            | 1.00  | 4.00                                            | 4.00  | 0.19                                          | 0.55  | 1.50                                           | 1.00   | 2.00                                          | 6.00  | 3.00                                         | 0.94  | 2.00                                         | 1.00  | 0.38                                           | 0.56  |
|                                                         | <i>Elettaria cardamomum</i>   | 3.00                                         | 1.69  | 2.00                                            | 1.00  | 4.00                                            | 3.00  | 2.00                                          | 1.00  | 2.00                                           | 0.46   | 4.00                                          | 4.67  | 1.50                                         | 1.13  | 2.00                                         | 1.00  | 0.50                                           | 0.42  |
|                                                         | <i>Ferula galbaniflua</i>     | 2.00                                         | 0.46  | 1.00                                            | 0.50  | 3.00                                            | 2.25  | 0.50                                          | 0.29  | 8.00                                           | 2.00   | 3.00                                          | 3.19  | 2.00                                         | 1.00  | 2.00                                         | 1.00  | 0.13                                           | 0.23  |

|                            |                                   |             |             |             |             |             |             |             |             |             |             |             |             |             |             |             |             |             |             |
|----------------------------|-----------------------------------|-------------|-------------|-------------|-------------|-------------|-------------|-------------|-------------|-------------|-------------|-------------|-------------|-------------|-------------|-------------|-------------|-------------|-------------|
|                            | <i>Helichrysum italicum</i>       | 2.00        | <b>0.38</b> | 2.00        | 1.00        | 4.00        | 3.00        | <b>0.50</b> | <b>0.29</b> | 2.00        | 0.83        | 6.00        | 6.75        | 6.00        | 2.00        | 2.00        | 1.17        | <b>0.19</b> | 0.84        |
|                            | <i>Juniperus virginiana</i>       | 1.50        | 1.59        | <b>1.00</b> | 0.75        | 2.00        | 1.50        | <b>0.25</b> | 0.73        | 3.00        | 1.25        | 3.00        | 6.00        | 1.50        | 0.75        | 2.00        | 1.50        | <b>0.50</b> | 0.75        |
|                            | <i>Lavandula angustifolia</i>     | 2.00        | 1.13        | 2.00        | 1.00        | 4.00        | 4.00        | 8.00        | 3.00        | 1.50        | 0.63        | 3.00        | 3.50        | <b>1.00</b> | 0.58        | 2.00        | 1.00        | <b>0.25</b> | <b>0.25</b> |
|                            | <i>Melaleuca viridiflora</i>      | 2.00        | <b>0.38</b> | 2.00        | 1.00        | 2.00        | 2.00        | 8.00        | 6.00        | 2.00        | 0.58        | 8.00        | 8.50        | <b>1.00</b> | <b>0.50</b> | 2.00        | 1.00        | <b>0.50</b> | 1.25        |
|                            | <i>Ocimum basilicum</i>           | <b>1.00</b> | 1.06        | 2.00        | 1.50        | 4.00        | 3.00        | 2.00        | 1.17        | 2.00        | 0.58        | 2.00        | 2.17        | <b>0.50</b> | <b>0.38</b> | 2.00        | 1.50        | <b>0.38</b> | 0.94        |
|                            | <i>Origanum vulgare</i>           | 2.00        | <b>0.25</b> | 2.00        | 1.00        | 4.00        | 3.00        | 3.00        | 2.25        | <b>1.00</b> | <b>0.33</b> | 2.00        | 2.33        | <b>1.00</b> | <b>0.50</b> | 2.00        | 1.00        | <b>0.50</b> | <b>0.38</b> |
|                            | <i>Pimenta racemosa</i>           | <b>1.00</b> | 1.06        | 2.00        | 1.00        | 2.00        | 2.00        | 1.50        | 1.88        | <b>1.00</b> | <b>0.42</b> | 4.00        | 5.33        | <b>0.50</b> | 0.63        | 2.00        | 1.50        | <b>0.25</b> | 0.63        |
|                            | <i>Pinus sylvestris</i>           | 2.00        | 0.63        | 2.00        | 1.00        | 2.00        | 2.00        | 8.00        | 4.67        | 2.00        | <b>0.46</b> | 8.00        | 8.50        | 2.00        | 1.00        | 2.00        | 1.00        | <b>0.13</b> | 0.56        |
|                            | <i>Piper nigrum</i>               | 2.00        | <b>0.25</b> | 2.00        | 1.00        | 4.00        | 2.67        | 1.50        | 0.63        | 8.00        | 2.33        | 4.00        | 5.00        | <b>1.00</b> | <b>0.50</b> | 2.00        | 1.00        | <b>0.50</b> | 1.25        |
|                            | <i>Rosmarinus officinalis</i>     | 2.00        | <b>0.38</b> | 2.00        | 1.00        | 2.00        | 1.50        | 1.50        | 1.13        | 2.00        | 0.58        | 8.00        | 8.50        | 2.00        | 1.00        | 2.00        | 1.00        | <b>0.13</b> | <b>0.31</b> |
|                            | <i>Salvia officinalis</i>         | 4.00        | 1.58        | 2.00        | 1.00        | 2.00        | 1.50        | 8.00        | 6.00        | <b>1.00</b> | <b>0.29</b> | 8.00        | 9.33        | <b>1.00</b> | 0.75        | 4.00        | 2.00        | <b>0.50</b> | 2.25        |
|                            | <i>Santalum austrocaledonicum</i> | <b>0.38</b> | <b>0.27</b> | <b>0.13</b> | <b>0.28</b> | <b>0.13</b> | <b>0.09</b> | <b>0.63</b> | 5.16        | 2.00        | 1.67        | <b>0.50</b> | 2.50        | 3.00        | 0.94        | <b>1.00</b> | 2.25        | <b>0.19</b> | 0.59        |
|                            | <i>Zingiber officinale</i>        | 2.00        | 1.13        | <b>1.00</b> | 0.75        | <b>1.00</b> | 0.75        | 1.50        | 1.13        | 4.00        | 1.67        | 6.00        | 7.00        | <b>1.00</b> | <b>0.38</b> | 2.00        | 1.50        | <b>0.38</b> | 0.56        |
| Canarium luzonicum (elemi) | <i>Boswellia carterii</i>         | 3.00        | 0.94        | 4.00        | 2.00        | 2.00        | 1.50        | 8.00        | 4.67        | 3.00        | 0.88        | 2.00        | 2.33        | 8.00        | 4.00        | 2.00        | 1.00        | <b>0.19</b> | <b>0.28</b> |
|                            | <i>Citrus sinensis</i>            | 3.00        | 0.94        | 8.00        | 4.00        | 2.00        | 1.00        | 8.00        | 6.67        | 8.00        | 2.00        | 2.00        | <b>0.46</b> | 8.00        | 4.00        | 2.00        | 0.83        | <b>0.13</b> | <b>0.19</b> |
|                            | <i>Elettaria cardamomum</i>       | 2.00        | 1.50        | 8.00        | 4.00        | 2.00        | 1.00        | 8.00        | 4.67        | 2.00        | <b>0.38</b> | 2.00        | 0.67        | 2.00        | 1.50        | 2.00        | 1.00        | <b>0.25</b> | <b>0.33</b> |
|                            | <i>Lavandula angustifolia</i>     | 1.50        | 1.13        | 8.00        | 4.00        | 2.00        | 1.50        | 8.00        | 3.67        | 2.00        | 0.75        | 2.00        | 0.67        | 1.50        | 0.88        | 4.00        | 2.00        | <b>0.19</b> | <b>0.28</b> |
|                            | <i>Rosmarinus officinalis</i>     | 2.00        | 0.75        | 8.00        | 4.00        | 2.00        | 1.00        | 3.00        | 2.50        | 4.00        | 1.00        | 8.00        | 1.83        | <b>1.00</b> | <b>0.50</b> | 2.00        | 1.00        | <b>0.25</b> | 0.75        |
|                            | <i>Zingiber officinale</i>        | 2.00        | 1.50        | 4.00        | 3.00        | 4.00        | 2.00        | <b>0.50</b> | <b>0.42</b> | 1.50        | 0.56        | 3.00        | 1.00        | <b>1.00</b> | <b>0.38</b> | 2.00        | 1.50        | <b>0.38</b> | 0.75        |
| Carum carvi (caraway)      | <i>Boswellia carterii</i>         | 2.00        | 0.63        | <b>1.00</b> | <b>0.50</b> | 2.00        | 1.50        | 2.00        | 1.00        | <b>1.00</b> | <b>0.29</b> | 8.00        | 10.67       | 2.00        | 1.00        | 1.50        | 0.75        | <b>0.50</b> | 0.75        |
|                            | <i>Canarium luzonicum</i>         | 8.00        | 4.00        | <b>1.00</b> | <b>0.50</b> | <b>1.00</b> | <b>0.50</b> | 2.00        | 1.17        | <b>1.00</b> | <b>0.25</b> | 6.00        | 3.00        | 8.00        | 4.00        | 2.00        | 1.00        | <b>0.75</b> | 1.50        |
|                            | <i>Citrus sinensis</i>            | 4.00        | 1.25        | 2.00        | 1.00        | 2.00        | 1.00        | 4.00        | 3.00        | 1.50        | <b>0.38</b> | 4.00        | 1.58        | 2.00        | 1.00        | <b>1.00</b> | <b>0.42</b> | <b>1.00</b> | 1.50        |
|                            | <i>Coriandrum sativum</i>         | <b>1.00</b> | 1.25        | <b>0.25</b> | <b>0.19</b> | <b>0.50</b> | <b>0.38</b> | <b>1.00</b> | 2.25        | <b>1.00</b> | <b>0.38</b> | <b>1.00</b> | 1.67        | <b>1.00</b> | 1.25        | 2.00        | 1.17        | <b>0.13</b> | 2.13        |
|                            | <i>Elettaria cardamomum</i>       | 1.50        | 1.13        | <b>1.00</b> | <b>0.50</b> | <b>1.00</b> | <b>0.50</b> | 6.00        | 3.00        | <b>1.00</b> | <b>0.19</b> | 8.00        | 4.00        | 3.00        | 2.25        | <b>1.00</b> | <b>0.50</b> | <b>0.50</b> | 0.67        |



|                                      |                                   |             |             |             |             |             |             |             |             |             |             |             |             |             |             |             |             |             |             |
|--------------------------------------|-----------------------------------|-------------|-------------|-------------|-------------|-------------|-------------|-------------|-------------|-------------|-------------|-------------|-------------|-------------|-------------|-------------|-------------|-------------|-------------|
|                                      | <i>Thymus vulgaris</i>            | <b>1.00</b> | <i>0.63</i> | <b>1.00</b> | <i>1.50</i> | <b>0.50</b> | <i>0.38</i> | <b>1.00</b> | <i>3.00</i> | <b>0.50</b> | <i>0.19</i> | <b>0.38</b> | <i>0.63</i> | <i>2.00</i> | <i>1.50</i> | <i>2.00</i> | <i>3.00</i> | <b>0.06</b> | <i>0.21</i> |
|                                      | <i>Zingiber officinale</i>        | <b>0.50</b> | <i>0.50</i> | <b>0.50</b> | <i>0.75</i> | <b>1.00</b> | <i>0.50</i> | <b>0.19</b> | <i>0.47</i> | <i>4.00</i> | <i>2.00</i> | <b>0.50</b> | <i>0.42</i> | <b>0.50</b> | <i>0.31</i> | <i>2.00</i> | <i>3.00</i> | <b>0.13</b> | <i>0.21</i> |
| <i>Citrus aurantifolia</i><br>(lime) | <i>Rosa damascena</i>             | <i>2.00</i> | <i>0.75</i> | <b>1.00</b> | <i>0.50</i> | <i>2.00</i> | <i>1.00</i> | <i>1.50</i> | <i>6.38</i> | <b>1.00</b> | <i>0.38</i> | <i>2.00</i> | <i>1.13</i> | <i>8.00</i> | <i>4.00</i> | <i>1.50</i> | <i>0.75</i> | <b>0.06</b> | <i>0.10</i> |
|                                      | <i>Rosmarinus officinalis</i>     | <i>2.00</i> | <b>0.50</b> | <i>2.00</i> | <i>1.00</i> | <i>2.00</i> | <i>1.00</i> | <i>8.00</i> | <i>6.00</i> | <i>2.00</i> | <b>0.50</b> | <i>4.00</i> | <b>0.50</b> | <i>2.00</i> | <i>1.00</i> | <i>2.00</i> | <i>1.00</i> | <b>0.13</b> | <i>0.33</i> |
|                                      | <i>Salvia officinalis</i>         | <i>2.00</i> | <i>0.92</i> | <b>1.00</b> | <i>0.50</i> | <i>2.00</i> | <i>1.00</i> | <i>8.00</i> | <i>6.00</i> | <i>2.00</i> | <b>0.50</b> | <i>6.00</i> | <i>1.38</i> | <i>8.00</i> | <i>6.00</i> | <i>2.00</i> | <i>1.00</i> | <b>0.25</b> | <i>1.17</i> |
| <i>Citrus bergamia</i><br>(bergamot) | <i>Citrus aurantifolia</i>        | <i>2.00</i> | <b>0.38</b> | <b>1.00</b> | <i>0.50</i> | <i>4.00</i> | <i>2.00</i> | <i>2.00</i> | <i>0.83</i> | <b>1.00</b> | <b>0.25</b> | <b>1.00</b> | <b>0.23</b> | <i>4.00</i> | <i>1.67</i> | <i>2.00</i> | <i>0.63</i> | <b>0.13</b> | <i>0.15</i> |
|                                      | <i>Citrus limon</i>               | <i>8.00</i> | <i>1.00</i> | <b>1.00</b> | <i>0.50</i> | <i>4.00</i> | <i>2.00</i> | <i>2.00</i> | <i>0.83</i> | <i>1.50</i> | <b>0.38</b> | <i>1.50</i> | <b>0.34</b> | <i>2.00</i> | <i>0.67</i> | <i>2.00</i> | <i>1.13</i> | <i>2.00</i> | <i>1.67</i> |
|                                      | <i>Commiphora molmol</i>          | <i>2.00</i> | <b>0.38</b> | <b>1.00</b> | <i>0.50</i> | <b>1.00</b> | <i>0.75</i> | <b>0.38</b> | <i>1.06</i> | <i>2.00</i> | <i>1.25</i> | <i>2.00</i> | <i>4.33</i> | <b>0.50</b> | <b>0.11</b> | <i>2.00</i> | <i>0.63</i> | <i>3.00</i> | <i>4.50</i> |
|                                      | <i>Coriandrum sativum</i>         | <b>1.00</b> | <i>1.06</i> | <b>0.25</b> | <i>0.19</i> | <i>4.00</i> | <i>3.00</i> | <b>0.75</b> | <i>1.63</i> | <b>0.75</b> | <b>0.28</b> | <b>0.50</b> | <i>0.75</i> | <b>1.00</b> | <i>1.17</i> | <i>2.00</i> | <i>0.79</i> | <b>0.13</b> | <i>2.06</i> |
|                                      | <i>Cupressus sempervirens</i>     | <i>4.00</i> | <i>0.92</i> | <i>2.00</i> | <i>1.00</i> | <b>1.00</b> | <b>0.31</b> | <i>6.00</i> | <i>2.00</i> | <b>1.00</b> | <b>0.25</b> | <i>1.50</i> | <b>0.50</b> | <i>2.00</i> | <i>0.83</i> | <i>2.00</i> | <b>0.25</b> | <b>1.00</b> | <i>1.50</i> |
|                                      | <i>Eucalyptus globulus</i>        | <i>6.00</i> | <i>1.13</i> | <b>1.00</b> | <i>0.50</i> | <i>4.00</i> | <i>2.33</i> | <i>8.00</i> | <i>3.33</i> | <b>1.00</b> | <b>0.25</b> | <i>1.50</i> | <b>0.50</b> | <i>2.00</i> | <i>0.83</i> | <i>2.00</i> | <i>0.63</i> | <i>2.00</i> | <i>2.00</i> |
|                                      | <i>Helichrysum italicum</i>       | <i>2.00</i> | <b>0.38</b> | <b>1.00</b> | <i>0.50</i> | <i>4.00</i> | <i>2.00</i> | <b>0.75</b> | <b>0.38</b> | <b>1.00</b> | <b>0.38</b> | <i>4.00</i> | <i>1.17</i> | <i>4.00</i> | <i>1.00</i> | <i>2.00</i> | <i>0.79</i> | <b>0.19</b> | <i>0.84</i> |
|                                      | <i>Lavandula angustifolia</i>     | <i>2.00</i> | <i>1.13</i> | <b>1.00</b> | <i>0.50</i> | <i>4.00</i> | <i>3.00</i> | <i>2.00</i> | <i>0.58</i> | <b>1.00</b> | <b>0.38</b> | <i>1.50</i> | <b>0.50</b> | <i>1.50</i> | <i>0.75</i> | <i>2.00</i> | <i>0.63</i> | <b>0.75</b> | <i>0.75</i> |
|                                      | <i>Lavandula burnati</i>          | <i>2.00</i> | <i>0.79</i> | <b>1.00</b> | <i>0.50</i> | <i>4.00</i> | <i>3.00</i> | <i>2.00</i> | <i>1.33</i> | <i>2.00</i> | <i>0.75</i> | <i>4.00</i> | <i>1.67</i> | <b>1.00</b> | <i>0.67</i> | <i>2.00</i> | <i>0.63</i> | <b>0.75</b> | <i>0.63</i> |
|                                      | <i>Lavandula spica</i>            | <i>2.00</i> | <i>1.13</i> | <b>1.00</b> | <i>0.50</i> | <i>4.00</i> | <i>2.33</i> | <i>2.00</i> | <i>0.67</i> | <b>1.00</b> | <b>0.25</b> | <i>1.50</i> | <b>0.44</b> | <i>1.50</i> | <i>0.75</i> | <i>2.00</i> | <i>1.13</i> | <b>0.25</b> | <b>0.21</b> |
|                                      | <i>Melaleuca alternifolia</i>     | <i>2.00</i> | <b>0.38</b> | <b>1.00</b> | <i>0.58</i> | <b>1.00</b> | <b>0.50</b> | <i>4.00</i> | <i>2.00</i> | <b>1.00</b> | <b>0.25</b> | <i>1.50</i> | <i>0.75</i> | <i>2.00</i> | <i>0.58</i> | <i>4.00</i> | <i>1.25</i> | <b>0.50</b> | <i>0.58</i> |
|                                      | <i>Myrtus communis</i>            | <i>2.00</i> | <b>0.38</b> | <i>2.00</i> | <i>1.00</i> | <b>1.00</b> | <b>0.50</b> | <i>8.00</i> | <i>1.83</i> | <b>1.00</b> | <b>0.21</b> | <i>1.50</i> | <b>0.38</b> | <i>1.50</i> | <i>0.63</i> | <i>2.00</i> | <i>0.63</i> | <b>0.25</b> | <b>0.19</b> |
|                                      | <i>Origanum vulgare</i>           | <i>8.00</i> | <i>1.00</i> | <b>1.00</b> | <i>0.50</i> | <b>1.00</b> | <b>0.50</b> | <i>8.00</i> | <i>5.33</i> | <b>1.00</b> | <b>0.29</b> | <i>6.00</i> | <i>2.00</i> | <i>8.00</i> | <i>3.33</i> | <i>2.00</i> | <i>0.63</i> | <b>0.25</b> | <b>0.19</b> |
|                                      | <i>Pinus sylvestris</i>           | <i>1.50</i> | <b>0.47</b> | <i>2.00</i> | <i>1.00</i> | <b>1.00</b> | <i>0.75</i> | <i>8.00</i> | <i>4.00</i> | <b>1.00</b> | <b>0.19</b> | <i>3.00</i> | <i>0.69</i> | <b>1.00</b> | <b>0.42</b> | <i>4.00</i> | <i>1.25</i> | <i>2.00</i> | <i>9.00</i> |
|                                      | <i>Rosa damascena</i>             | <b>1.00</b> | <b>0.31</b> | <b>1.00</b> | <i>0.50</i> | <b>1.00</b> | <b>0.50</b> | <i>1.50</i> | <i>6.25</i> | <i>8.00</i> | <i>3.00</i> | <i>1.50</i> | <i>1.00</i> | <i>3.00</i> | <i>1.25</i> | <b>1.00</b> | <b>0.31</b> | <b>0.13</b> | <i>0.19</i> |
|                                      | <i>Rosmarinus officinalis</i>     | <i>2.00</i> | <b>0.38</b> | <b>1.00</b> | <i>0.50</i> | <i>2.00</i> | <i>1.00</i> | <i>8.00</i> | <i>5.33</i> | <i>2.00</i> | <b>0.50</b> | <b>0.75</b> | <b>0.17</b> | <b>0.75</b> | <b>0.31</b> | <b>1.00</b> | <b>0.31</b> | <i>1.50</i> | <i>3.75</i> |
|                                      | <i>Salvia officinalis</i>         | <i>2.00</i> | <i>0.79</i> | <b>1.00</b> | <i>0.50</i> | <i>8.00</i> | <i>4.00</i> | <i>8.00</i> | <i>5.33</i> | <b>1.00</b> | <b>0.25</b> | <i>3.00</i> | <i>1.00</i> | <b>1.00</b> | <i>0.67</i> | <b>1.00</b> | <b>0.31</b> | <b>0.19</b> | <i>0.84</i> |
|                                      | <i>Santalum austrocaledonicum</i> | <i>1.50</i> | <i>1.09</i> | <b>0.50</b> | <i>1.13</i> | <b>1.00</b> | <b>0.50</b> | <b>0.63</b> | <i>5.10</i> | <b>0.19</b> | <b>0.15</b> | <b>0.19</b> | <i>0.78</i> | <b>1.00</b> | <b>0.23</b> | <i>4.00</i> | <i>8.25</i> | <b>0.25</b> | <i>0.79</i> |
|                                      | <i>Thymus vulgaris</i>            | <i>2.00</i> | <b>0.38</b> | <b>1.00</b> | <i>0.75</i> | <b>1.00</b> | <i>0.75</i> | <b>1.00</b> | <i>1.17</i> | <b>1.00</b> | <b>0.25</b> | <i>1.50</i> | <i>1.75</i> | <i>2.00</i> | <i>0.83</i> | <i>2.00</i> | <i>1.13</i> | <b>0.13</b> | <b>0.40</b> |

|                                          |                                   |             |             |             |             |             |             |             |       |             |             |             |             |             |             |             |             |             |             |
|------------------------------------------|-----------------------------------|-------------|-------------|-------------|-------------|-------------|-------------|-------------|-------|-------------|-------------|-------------|-------------|-------------|-------------|-------------|-------------|-------------|-------------|
| <i>Citrus limon</i><br>(lemon)           | <i>Citrus sinensis</i>            | 2.00        | <b>0.25</b> | 2.00        | 1.00        | 4.00        | 2.00        | 3.00        | 2.25  | 1.50        | <b>0.38</b> | 6.00        | 0.75        | 2.00        | 0.83        | 4.00        | 2.67        | <b>1.00</b> | 0.83        |
|                                          | <i>Commiphora molmol</i>          | 2.00        | <b>0.38</b> | <b>1.00</b> | <b>0.50</b> | 4.00        | 3.00        | 2.00        | 5.83  | 4.00        | 2.50        | 4.00        | 8.25        | <b>1.00</b> | <b>0.23</b> | 2.00        | 1.50        | <b>0.50</b> | 0.67        |
|                                          | <i>Melaleuca viridiflora</i>      | 2.00        | <b>0.38</b> | <b>1.00</b> | <b>0.50</b> | 2.00        | 1.50        | <b>1.00</b> | 0.75  | 2.00        | <b>0.50</b> | 4.00        | <b>0.50</b> | 3.00        | 1.25        | 2.00        | 1.50        | <b>1.00</b> | 2.33        |
|                                          | <i>Mentha piperita</i>            | 2.00        | 1.13        | 2.00        | 1.00        | 2.00        | 0.75        | 1.50        | 0.88  | <b>1.00</b> | <b>0.25</b> | 6.00        | 1.88        | 4.00        | 2.67        | 2.00        | 1.50        | <b>0.25</b> | <b>0.17</b> |
|                                          | <i>Pimenta racemosa</i>           | 2.00        | 2.13        | <b>1.00</b> | <b>0.50</b> | 2.00        | 1.50        | <b>0.75</b> | 0.94  | 2.00        | 0.75        | 4.00        | 1.58        | <b>0.75</b> | 0.88        | 2.00        | 2.00        | <b>0.25</b> | 0.58        |
|                                          | <i>Rosa damascena</i>             | 2.00        | 0.63        | <b>1.00</b> | <b>0.50</b> | 2.00        | 1.00        | <b>0.50</b> | 2.13  | <b>1.00</b> | <b>0.38</b> | 3.00        | 1.69        | 2.00        | 0.83        | 2.00        | 1.50        | <b>0.13</b> | <b>0.17</b> |
|                                          | <i>Santalum austrocaledonicum</i> | <b>0.38</b> | <b>0.27</b> | <b>0.13</b> | <b>0.28</b> | <b>0.25</b> | <b>0.13</b> | <b>0.19</b> | 1.55  | 2.00        | 1.58        | <b>0.50</b> | 2.03        | 4.00        | 0.92        | <b>1.00</b> | 2.50        | <b>0.06</b> | <b>0.19</b> |
|                                          | <i>Thymus vulgaris</i>            | 2.00        | <b>0.38</b> | <b>1.00</b> | 0.75        | <b>1.00</b> | 0.75        | 2.00        | 2.50  | 1.50        | <b>0.38</b> | 4.00        | 4.25        | 8.00        | 3.33        | 2.00        | 2.00        | <b>0.50</b> | 1.50        |
| <i>Citrus sinensis</i><br>(orange)       | <i>Melaleuca alternifolia</i>     | 3.00        | 0.56        | <b>1.00</b> | 0.58        | <b>1.00</b> | <b>0.50</b> | 3.00        | 2.50  | 2.00        | <b>0.50</b> | 4.00        | 1.58        | 4.00        | 1.50        | 2.00        | 0.83        | <b>0.50</b> | 0.58        |
|                                          | <i>Pimenta racemosa</i>           | 1.50        | 1.59        | <b>1.00</b> | <b>0.50</b> | 2.00        | 1.50        | 1.50        | 2.25  | 2.00        | 0.75        | 4.00        | 1.58        | <b>0.50</b> | 0.63        | 2.00        | 1.33        | <b>0.50</b> | 1.25        |
|                                          | <i>Rosa damascena</i>             | 1.50        | <b>0.47</b> | <b>1.00</b> | <b>0.50</b> | 2.00        | 1.00        | <b>0.75</b> | 3.38  | <b>1.00</b> | <b>0.38</b> | 6.00        | 3.38        | 4.00        | 2.00        | 2.00        | 0.83        | <b>0.13</b> | <b>0.19</b> |
|                                          | <i>Rosmarinus officinalis</i>     | 2.00        | <b>0.38</b> | 2.00        | 1.00        | 4.00        | 2.00        | 2.00        | 2.00  | 2.00        | <b>0.50</b> | 8.00        | 1.00        | 2.00        | 1.00        | 2.00        | 0.83        | <b>0.13</b> | <b>0.31</b> |
|                                          | <i>Salvia officinalis</i>         | 8.00        | 3.17        | 2.00        | 1.00        | 4.00        | 2.00        | 1.50        | 1.50  | 2.00        | <b>0.50</b> | 8.00        | 1.83        | <b>0.50</b> | <b>0.38</b> | 2.00        | 0.83        | <b>1.00</b> | 4.50        |
|                                          | <i>Thymus vulgaris</i>            | <b>1.00</b> | <b>0.19</b> | <b>1.00</b> | 0.75        | <b>1.00</b> | 0.75        | 2.00        | 3.00  | 2.00        | <b>0.50</b> | 4.00        | 4.25        | <b>1.00</b> | <b>0.50</b> | 2.00        | 1.33        | <b>0.50</b> | 1.58        |
| <i>Commiphora molmol</i><br>(myrrh)      | <i>Mentha piperita</i>            | 2.00        | 1.25        | 2.00        | 1.00        | 2.00        | 1.25        | 1.50        | 4.50  | <b>1.00</b> | 0.63        | 8.00        | 18.00       | 1.50        | 0.84        | <b>1.00</b> | <b>0.50</b> | <b>0.50</b> | 0.67        |
|                                          | <i>Pinus sylvestris</i>           | 2.00        | 0.75        | 2.00        | 1.00        | 2.00        | 2.00        | 1.50        | 4.50  | 1.50        | 0.84        | 8.00        | 16.50       | <b>1.00</b> | <b>0.31</b> | <b>1.00</b> | <b>0.50</b> | <b>0.38</b> | 1.88        |
|                                          | <i>Santalum austrocaledonicum</i> | <b>0.25</b> | <b>0.20</b> | <b>0.25</b> | 0.56        | <b>0.25</b> | <b>0.19</b> | 2.00        | 21.33 | <b>0.75</b> | 0.88        | 2.00        | 12.00       | 2.00        | <b>0.25</b> | 2.00        | 4.50        | <b>0.09</b> | <b>0.34</b> |
|                                          | <i>Thymus vulgaris</i>            | <b>1.00</b> | <b>0.25</b> | <b>1.00</b> | 0.75        | 4.00        | 4.00        | <b>1.00</b> | 3.67  | <b>0.50</b> | <b>0.31</b> | 2.00        | 6.00        | <b>1.00</b> | <b>0.31</b> | <b>1.00</b> | 0.75        | <b>0.25</b> | 0.92        |
| <i>Coriandrum sativum</i><br>(coriander) | <i>Boswellia carterii</i>         | 3.00        | 3.19        | 2.00        | 1.50        | <b>1.00</b> | 1.00        | 3.00        | 6.75  | <b>1.00</b> | <b>0.42</b> | <b>0.50</b> | 1.17        | <b>1.00</b> | 1.25        | 2.00        | 1.17        | <b>1.00</b> | 16.50       |
|                                          | <i>Cinnamomum zeylanicum</i>      | <b>0.50</b> | 0.75        | <b>0.13</b> | <b>0.19</b> | <b>1.00</b> | 0.75        | <b>0.38</b> | 1.50  | <b>0.50</b> | <b>0.25</b> | <b>0.50</b> | 1.00        | <b>1.00</b> | 1.50        | 2.00        | 2.67        | <b>0.13</b> | 2.08        |
|                                          | <i>Citrus limon</i>               | <b>1.00</b> | 1.06        | 4.00        | 3.00        | 4.00        | 3.00        | <b>1.00</b> | 2.25  | <b>1.00</b> | <b>0.38</b> | 2.00        | 2.79        | 2.00        | 2.33        | 2.00        | 1.67        | <b>0.13</b> | 2.04        |
|                                          | <i>Citrus sinensis</i>            | <b>1.00</b> | 1.06        | 2.00        | 1.50        | 4.00        | 3.00        | 1.50        | 3.75  | <b>1.00</b> | <b>0.38</b> | 4.00        | 5.58        | 2.00        | 2.50        | 2.00        | 1.00        | <b>0.13</b> | 2.06        |
|                                          | <i>Cupressus sempervirens</i>     | 4.00        | 4.67        | 2.00        | 1.50        | <b>1.00</b> | 0.56        | <b>0.50</b> | 1.08  | <b>1.00</b> | <b>0.38</b> | <b>1.00</b> | 1.50        | <b>0.75</b> | 0.94        | 2.00        | 0.79        | <b>0.25</b> | 4.25        |
|                                          | <i>Cymbopogon citratus</i>        | <b>0.50</b> | 0.75        | <b>1.00</b> | 0.75        | <b>0.75</b> | 0.75        | <b>0.19</b> | 0.63  | <b>1.00</b> | <b>0.50</b> | 2.00        | 3.33        | <b>1.00</b> | 1.06        | 2.00        | 1.17        | <b>0.13</b> | 2.01        |

|                                            |                                   |             |             |             |             |             |             |             |             |             |             |             |             |             |             |      |             |             |             |
|--------------------------------------------|-----------------------------------|-------------|-------------|-------------|-------------|-------------|-------------|-------------|-------------|-------------|-------------|-------------|-------------|-------------|-------------|------|-------------|-------------|-------------|
| <i>Cupressus sempervirens</i><br>(cypress) | <i>Ferula galbaniflua</i>         | 2.00        | 2.33        | 2.00        | 1.50        | <b>1.00</b> | 0.75        | <b>0.13</b> | <b>0.29</b> | <b>1.00</b> | <b>0.33</b> | <b>0.50</b> | 0.70        | 1.50        | 1.88        | 2.00 | 1.17        | <b>0.19</b> | 3.25        |
|                                            | <i>Melaleuca viridiflora</i>      | 1.50        | 1.69        | <b>1.00</b> | 0.75        | 2.00        | 2.00        | <b>0.75</b> | 1.88        | 2.00        | 0.75        | 3.00        | 4.19        | <b>1.00</b> | 1.25        | 2.00 | 1.17        | <b>0.09</b> | 1.69        |
|                                            | <i>Myrtus communis</i>            | <b>1.00</b> | 1.13        | <b>1.00</b> | 0.75        | 2.00        | 1.50        | <b>0.75</b> | 1.55        | 1.50        | <b>0.50</b> | 2.00        | 2.83        | <b>1.00</b> | 1.25        | 2.00 | 1.17        | <b>0.09</b> | 1.53        |
|                                            | <i>Pinus sylvestris</i>           | <b>1.00</b> | 1.25        | 2.00        | 1.50        | 4.00        | 4.00        | <b>1.00</b> | 2.33        | <b>1.00</b> | <b>0.31</b> | 4.00        | 5.58        | 2.00        | 2.50        | 2.00 | 1.17        | <b>0.06</b> | 1.26        |
|                                            | <i>Piper nigrum</i>               | <b>1.00</b> | 1.06        | 4.00        | 3.00        | 1.50        | 1.00        | <b>1.00</b> | 2.17        | <b>1.00</b> | <b>0.38</b> | <b>1.00</b> | 1.58        | 2.00        | 2.50        | 2.00 | 1.17        | <b>0.09</b> | 1.69        |
|                                            | <i>Salvia officinalis</i>         | <b>1.00</b> | 1.33        | 4.00        | 3.00        | 2.00        | 1.50        | <b>0.38</b> | 0.94        | <b>0.50</b> | <b>0.19</b> | 6.00        | 9.00        | 1.50        | 2.25        | 2.00 | 1.17        | <b>0.06</b> | 1.26        |
|                                            | <i>Santalum austrocaledonicum</i> | <b>0.75</b> | 1.25        | <b>0.25</b> | 0.63        | <b>0.38</b> | <b>0.28</b> | <b>0.63</b> | 6.25        | <b>0.38</b> | <b>0.34</b> | <b>0.50</b> | 2.67        | <b>1.00</b> | 1.06        | 2.00 | 4.67        | <b>0.13</b> | 2.33        |
|                                            | <i>Zingiber officinale</i>        | <b>0.50</b> | 0.75        | 2.00        | 2.00        | 2.00        | 1.50        | <b>0.19</b> | <b>0.47</b> | <b>0.75</b> | <b>0.38</b> | 2.00        | 3.00        | <b>1.00</b> | 1.13        | 2.00 | 1.67        | <b>0.13</b> | 2.13        |
|                                            | <i>Boswellia carterii</i>         | 2.00        | <b>0.46</b> | 2.00        | 1.00        | 1.50        | 0.84        | 8.00        | 3.33        | 2.00        | 0.58        | 2.00        | 2.33        | <b>1.00</b> | <b>0.50</b> | 2.00 | 0.63        | <b>0.25</b> | <b>0.38</b> |
|                                            | <i>Citrus limon</i>               | 4.00        | 0.92        | 2.00        | 1.00        | 1.50        | <b>0.47</b> | 8.00        | 3.33        | 2.00        | <b>0.50</b> | 6.00        | 1.38        | 8.00        | 3.33        | 2.00 | 1.13        | <b>0.38</b> | <b>0.50</b> |
|                                            | <i>Citrus sinensis</i>            | 4.00        | 0.92        | 2.00        | 1.00        | 2.00        | 0.63        | <b>0.63</b> | <b>0.42</b> | 3.00        | 0.75        | 3.00        | 0.69        | 8.00        | 4.00        | 2.00 | <b>0.46</b> | <b>0.25</b> | <b>0.38</b> |
|                                            | <i>Commiphora molmol</i>          | 2.00        | 0.58        | 2.00        | 1.00        | 2.00        | 1.13        | 6.00        | 17.00       | <b>1.00</b> | 0.63        | 4.00        | 8.67        | 1.50        | <b>0.47</b> | 2.00 | 0.63        | <b>0.50</b> | 1.00        |
|                                            | <i>Hyssopus officinalis</i>       | 2.00        | 0.83        | 2.00        | 1.00        | <b>1.00</b> | <b>0.31</b> | 1.50        | 1.00        | 1.50        | <b>0.38</b> | 2.00        | <b>0.46</b> | <b>1.00</b> | <b>0.50</b> | 2.00 | 0.63        | <b>0.50</b> | 2.50        |
|                                            | <i>Juniperus virginiana</i>       | <b>1.00</b> | 1.17        | 2.00        | 1.50        | <b>0.50</b> | <b>0.16</b> | <b>0.13</b> | <b>0.35</b> | 2.00        | 0.75        | 3.00        | 3.50        | 8.00        | 4.00        | 2.00 | 1.13        | <b>0.50</b> | 1.00        |
|                                            | <i>Lavandula angustifolia</i>     | 2.00        | 1.33        | 2.00        | 1.00        | 1.50        | 0.84        | 8.00        | 2.33        | 2.00        | 0.75        | 4.00        | 1.33        | <b>1.00</b> | 0.58        | 2.00 | 0.63        | <b>0.13</b> | <b>0.19</b> |
|                                            | <i>Melaleuca alternifolia</i>     | 4.00        | 1.17        | <b>1.00</b> | 0.58        | 2.00        | 0.63        | 1.50        | 0.75        | <b>1.00</b> | <b>0.25</b> | 3.00        | 1.50        | 4.00        | 1.50        | 2.00 | 0.63        | <b>0.09</b> | <b>0.16</b> |
|                                            | <i>Mentha piperita</i>            | 2.00        | 1.33        | 2.00        | 1.00        | 2.00        | <b>0.38</b> | 4.00        | 2.00        | 3.00        | 0.75        | 2.00        | 0.83        | 1.50        | 1.13        | 2.00 | 0.63        | <b>0.19</b> | <b>0.25</b> |
|                                            | <i>Origanum vulgare</i>           | 2.00        | <b>0.46</b> | 2.00        | 1.00        | 2.00        | 0.63        | 6.00        | 4.00        | 2.00        | 0.58        | 8.00        | 2.67        | 1.50        | 0.75        | 2.00 | 0.63        | <b>0.75</b> | 0.94        |
|                                            | <i>Pinus sylvestris</i>           | 2.00        | 0.83        | 2.00        | 1.00        | 2.00        | 1.13        | 8.00        | 4.00        | 4.00        | 0.75        | 2.00        | <b>0.46</b> | 8.00        | 4.00        | 2.00 | 0.63        | <b>0.13</b> | 0.63        |
|                                            | <i>Rosmarinus officinalis</i>     | 2.00        | 0.58        | <b>1.00</b> | <b>0.50</b> | 2.00        | 0.63        | 8.00        | 5.33        | 2.00        | <b>0.50</b> | 8.00        | 1.83        | 8.00        | 4.00        | 2.00 | 0.63        | <b>0.13</b> | <b>0.38</b> |
|                                            | <i>Salvia officinalis</i>         | 2.00        | 1.00        | <b>1.00</b> | <b>0.50</b> | 8.00        | 2.50        | 8.00        | 5.33        | 2.00        | <b>0.50</b> | 8.00        | 2.67        | <b>1.00</b> | 0.75        | 2.00 | 0.63        | <b>0.25</b> | 1.25        |
|                                            | <i>Salvia sclarea</i>             | 2.00        | <b>0.46</b> | 2.00        | 1.00        | 2.00        | <b>0.25</b> | 4.00        | 1.33        | 2.00        | <b>0.50</b> | 2.00        | 0.67        | <b>1.00</b> | <b>0.31</b> | 2.00 | <b>0.25</b> | <b>0.25</b> | 1.25        |
|                                            | <i>Santalum austrocaledonicum</i> | <b>0.19</b> | <b>0.16</b> | <b>0.13</b> | <b>0.28</b> | <b>0.09</b> | <b>0.03</b> | <b>0.19</b> | 1.53        | 2.00        | 1.58        | 4.00        | 16.67       | 8.00        | 2.50        | 2.00 | 4.13        | <b>0.13</b> | <b>0.46</b> |
|                                            | <i>Citrus sinensis</i>            | <b>1.00</b> | 0.56        | <b>1.00</b> | <b>0.50</b> | <b>1.00</b> | 0.75        | <b>1.00</b> | 1.83        | 2.00        | 0.75        | 2.00        | 0.79        | <b>1.00</b> | <b>0.31</b> | 2.00 | 0.83        | <b>0.25</b> | <b>0.14</b> |

|                                            |                                   |      |      |      |      |      |      |      |      |      |      |      |       |      |      |      |      |      |      |
|--------------------------------------------|-----------------------------------|------|------|------|------|------|------|------|------|------|------|------|-------|------|------|------|------|------|------|
| <i>Cymbopogon citratus</i><br>(lemongrass) | <i>Melaleuca alternifolia</i>     | 1.00 | 0.63 | 0.50 | 0.29 | 1.00 | 0.75 | 1.00 | 1.67 | 1.00 | 0.38 | 3.00 | 2.00  | 2.00 | 0.38 | 2.00 | 1.00 | 0.25 | 0.18 |
|                                            | <i>Melaleuca viridiflora</i>      | 1.00 | 0.63 | 0.50 | 0.25 | 1.00 | 1.00 | 0.75 | 1.38 | 1.50 | 0.56 | 2.00 | 0.79  | 2.00 | 0.63 | 2.00 | 1.00 | 0.25 | 0.52 |
|                                            | <i>Mentha piperita</i>            | 1.00 | 1.00 | 1.00 | 0.50 | 1.00 | 0.63 | 1.00 | 1.67 | 1.00 | 0.38 | 2.00 | 1.17  | 2.00 | 1.13 | 4.00 | 2.00 | 0.25 | 0.10 |
|                                            | <i>Pimenta racemosa</i>           | 1.00 | 1.50 | 1.00 | 0.50 | 1.00 | 1.00 | 1.00 | 2.33 | 1.00 | 0.50 | 2.00 | 1.33  | 1.00 | 1.06 | 2.00 | 1.50 | 0.13 | 0.26 |
|                                            | <i>Rosmarinus officinalis</i>     | 1.00 | 0.63 | 0.75 | 0.38 | 1.00 | 0.75 | 1.00 | 1.83 | 1.00 | 0.38 | 4.00 | 1.58  | 2.00 | 0.63 | 2.00 | 1.00 | 0.13 | 0.26 |
|                                            | <i>Santalum austrocaledonicum</i> | 0.50 | 0.58 | 0.13 | 0.28 | 0.13 | 0.09 | 0.25 | 2.33 | 1.00 | 0.92 | 0.50 | 2.17  | 1.00 | 0.13 | 2.00 | 4.50 | 0.13 | 0.34 |
|                                            | <i>Thymus vulgaris</i>            | 1.00 | 0.63 | 0.50 | 0.38 | 0.50 | 0.50 | 1.00 | 2.33 | 3.00 | 1.13 | 3.00 | 4.00  | 0.50 | 0.16 | 1.00 | 0.75 | 0.13 | 0.34 |
| <i>Daucus carota</i><br>(carrot seed)      | <i>Citrus aurantifolia</i>        | 4.00 | 1.50 | 1.00 | 0.50 | 2.00 | 1.50 | 2.00 | 1.50 | 1.00 | 0.25 | 1.50 | 3.09  | 2.00 | 1.00 | 2.00 | 1.00 | 0.38 | 0.75 |
|                                            | <i>Citrus bergamia</i>            | 8.00 | 2.50 | 0.50 | 0.25 | 2.00 | 1.50 | 2.00 | 1.33 | 1.00 | 0.25 | 2.00 | 4.33  | 3.00 | 1.25 | 2.00 | 0.63 | 1.50 | 2.75 |
|                                            | <i>Citrus limon</i>               | 8.00 | 2.50 | 2.00 | 1.00 | 2.00 | 1.50 | 2.00 | 1.50 | 1.00 | 0.25 | 1.00 | 2.06  | 2.00 | 0.83 | 1.50 | 1.13 | 0.75 | 1.25 |
|                                            | <i>Citrus sinensis</i>            | 4.00 | 1.25 | 1.00 | 0.50 | 2.00 | 1.50 | 2.00 | 2.00 | 2.00 | 0.50 | 2.00 | 4.13  | 2.00 | 1.00 | 2.00 | 0.83 | 0.75 | 1.38 |
|                                            | <i>Lavandula angustifolia</i>     | 1.00 | 0.75 | 1.00 | 0.50 | 2.00 | 2.00 | 2.00 | 1.25 | 1.00 | 0.38 | 1.50 | 3.25  | 3.00 | 1.75 | 2.00 | 1.00 | 0.19 | 0.34 |
|                                            | <i>Rosmarinus officinalis</i>     | 2.00 | 0.75 | 1.00 | 0.50 | 2.00 | 1.50 | 2.00 | 2.00 | 1.00 | 0.25 | 2.00 | 4.13  | 2.00 | 1.00 | 1.50 | 0.75 | 0.50 | 1.67 |
| <i>Elettaria cardamomum</i><br>(cardamom)  | <i>Citrus limon</i>               | 2.00 | 1.13 | 2.00 | 1.00 | 2.00 | 1.00 | 2.00 | 1.00 | 1.00 | 0.19 | 8.00 | 1.83  | 1.00 | 0.67 | 2.00 | 1.50 | 0.75 | 0.50 |
|                                            | <i>Coriandrum sativum</i>         | 0.50 | 0.75 | 0.25 | 0.19 | 0.50 | 0.38 | 0.75 | 1.69 | 1.00 | 0.31 | 0.50 | 0.75  | 1.00 | 1.50 | 2.00 | 1.17 | 0.13 | 2.04 |
|                                            | <i>Myrtus communis</i>            | 1.50 | 0.94 | 2.00 | 1.00 | 2.00 | 1.00 | 4.00 | 1.25 | 1.50 | 0.22 | 8.00 | 2.00  | 1.00 | 0.75 | 2.00 | 1.00 | 0.25 | 0.15 |
|                                            | <i>Pinus sylvestris</i>           | 1.00 | 0.75 | 2.00 | 1.00 | 2.00 | 1.50 | 8.00 | 4.67 | 1.50 | 0.19 | 3.00 | 0.69  | 3.00 | 2.25 | 2.00 | 1.00 | 0.19 | 0.81 |
| <i>Eucalyptus globulus</i><br>(eucalyptus) | <i>Citrus limon</i>               | 2.00 | 0.38 | 2.00 | 1.00 | 2.00 | 1.17 | 8.00 | 4.00 | 2.00 | 0.50 | 8.00 | 1.83  | 8.00 | 3.33 | 2.00 | 1.50 | 0.13 | 0.10 |
|                                            | <i>Commiphora molmol</i>          | 2.00 | 0.50 | 2.00 | 1.00 | 0.50 | 0.42 | 0.63 | 1.82 | 1.00 | 0.63 | 8.00 | 17.33 | 2.00 | 0.63 | 2.00 | 1.00 | 0.25 | 0.38 |
|                                            | <i>Coriandrum sativum</i>         | 1.50 | 1.69 | 0.50 | 0.38 | 1.00 | 0.83 | 1.50 | 3.38 | 2.00 | 0.75 | 2.00 | 3.00  | 3.00 | 3.75 | 1.00 | 0.58 | 0.13 | 2.06 |
|                                            | <i>Cupressus sempervirens</i>     | 2.00 | 0.58 | 1.50 | 0.75 | 1.50 | 0.59 | 8.00 | 3.33 | 2.00 | 0.50 | 8.00 | 2.67  | 1.00 | 0.50 | 2.00 | 0.63 | 0.25 | 0.38 |
|                                            | <i>Cymbopogon citratus</i>        | 1.00 | 0.63 | 1.00 | 0.50 | 2.00 | 1.67 | 0.13 | 0.20 | 1.00 | 0.38 | 3.00 | 1.50  | 8.00 | 2.50 | 2.00 | 1.00 | 0.06 | 0.04 |
|                                            | <i>Juniperus virginiana</i>       | 1.00 | 1.13 | 1.00 | 0.75 | 2.00 | 1.17 | 0.25 | 0.73 | 1.00 | 0.38 | 3.00 | 3.50  | 1.00 | 0.50 | 2.00 | 1.50 | 0.13 | 0.19 |
|                                            | <i>Lavandula angustifolia</i>     | 1.00 | 0.63 | 2.00 | 1.00 | 2.00 | 1.00 | 8.00 | 3.00 | 2.00 | 0.75 | 8.00 | 2.67  | 1.00 | 0.58 | 2.00 | 1.00 | 0.19 | 0.19 |

|                                         |                               |             |             |             |      |             |      |             |             |             |             |      |             |             |             |      |      |             |             |
|-----------------------------------------|-------------------------------|-------------|-------------|-------------|------|-------------|------|-------------|-------------|-------------|-------------|------|-------------|-------------|-------------|------|------|-------------|-------------|
|                                         | <i>Melaleuca alternifolia</i> | 2.00        | <b>0.50</b> | <b>1.00</b> | 0.58 | 2.00        | 1.17 | 3.00        | 1.75        | 1.50        | <b>0.38</b> | 2.00 | 1.00        | 4.00        | 1.50        | 2.00 | 1.00 | <b>0.06</b> | <b>0.07</b> |
|                                         | <i>Mentha piperita</i>        | 2.00        | 1.25        | 2.00        | 1.00 | 1.50        | 0.69 | 8.00        | 4.67        | 2.00        | <b>0.50</b> | 8.00 | 3.33        | <b>1.00</b> | 0.75        | 2.00 | 1.00 | <b>0.13</b> | <b>0.10</b> |
|                                         | <i>Origanum vulgare</i>       | 3.00        | 0.56        | 2.00        | 1.00 | 4.00        | 2.33 | 8.00        | 6.00        | 2.00        | 0.58        | 8.00 | 2.67        | <b>1.00</b> | <b>0.50</b> | 2.00 | 1.00 | <b>0.19</b> | <b>0.14</b> |
|                                         | <i>Pinus sylvestris</i>       | 2.00        | 0.75        | 2.00        | 1.00 | <b>1.00</b> | 0.83 | 8.00        | 4.67        | 2.00        | <b>0.38</b> | 8.00 | 1.83        | 2.00        | 1.00        | 2.00 | 1.00 | <b>0.06</b> | <b>0.28</b> |
|                                         | <i>Rosmarinus officinalis</i> | 2.00        | <b>0.50</b> | 2.00        | 1.00 | 2.00        | 1.17 | 8.00        | 6.00        | 2.00        | <b>0.50</b> | 8.00 | 1.83        | 1.50        | 0.75        | 2.00 | 1.00 | <b>0.25</b> | 0.63        |
|                                         | <i>Styrax benzoin</i>         | 8.00        | 2.00        | 8.00        | 4.00 | 2.00        | 0.92 | 8.00        | 4.67        | 4.00        | 1.00        | 2.00 | 0.83        | 8.00        | 4.00        | 2.00 | 1.00 | 8.00        | 14.67       |
|                                         | <i>Thymus vulgaris</i>        | 2.00        | <b>0.50</b> | 2.00        | 1.50 | 2.00        | 1.67 | 2.00        | 2.50        | <b>1.00</b> | <b>0.25</b> | 6.00 | 7.00        | 2.00        | 1.00        | 2.00 | 1.50 | <b>0.13</b> | <b>0.40</b> |
|                                         | <i>Zingiber officinale</i>    | 2.00        | 1.25        | 2.00        | 1.50 | 2.00        | 1.17 | <b>0.25</b> | <b>0.19</b> | <b>1.00</b> | <b>0.38</b> | 4.00 | 1.33        | 2.00        | 0.75        | 2.00 | 1.50 | <b>0.50</b> | 0.75        |
| <i>Ferula galbaniflua</i><br>(galbanum) | <i>Canarium luzonicum</i>     | 2.00        | 0.83        | 2.00        | 1.00 | 2.00        | 1.00 | <b>1.00</b> | 0.67        | 2.00        | <b>0.42</b> | 4.00 | 0.92        | <b>1.00</b> | <b>0.50</b> | 4.00 | 2.00 | <b>0.25</b> | 0.58        |
|                                         | <i>Commiphora molmol</i>      | <b>1.00</b> | <b>0.29</b> | 2.00        | 1.00 | 2.00        | 1.50 | <b>0.50</b> | 1.50        | 1.50        | 0.88        | 2.00 | 4.13        | 2.00        | 0.63        | 4.00 | 2.00 | <b>0.25</b> | 0.58        |
|                                         | <i>Elettaria cardamomum</i>   | 2.00        | 1.33        | 8.00        | 4.00 | 2.00        | 1.00 | 6.00        | 3.50        | 3.00        | <b>0.44</b> | 6.00 | 1.38        | <b>0.75</b> | 0.56        | 8.00 | 4.00 | <b>0.75</b> | 1.25        |
|                                         | <i>Melaleuca viridiflora</i>  | 2.00        | 0.58        | 2.00        | 1.00 | 2.00        | 1.50 | <b>1.00</b> | 0.83        | 2.00        | <b>0.42</b> | 4.00 | <b>0.50</b> | 2.00        | 1.00        | 3.00 | 1.50 | <b>0.75</b> | 2.50        |
|                                         | <i>Pimenta racemosa</i>       | 1.50        | 1.75        | 2.00        | 1.00 | 2.00        | 1.50 | <b>0.38</b> | <b>0.50</b> | 1.50        | <b>0.50</b> | 3.00 | 1.19        | <b>0.50</b> | 0.63        | 2.00 | 1.50 | <b>0.38</b> | 1.25        |
|                                         | <i>Pinus sylvestris</i>       | 4.00        | 1.67        | 2.00        | 1.00 | 2.00        | 1.50 | <b>0.75</b> | <b>0.50</b> | 1.50        | <b>0.22</b> | 4.00 | <b>0.50</b> | 6.00        | 3.00        | 8.00 | 4.00 | <b>0.38</b> | 2.00        |
|                                         | <i>Rosa damascena</i>         | 2.00        | 0.83        | 2.00        | 1.00 | 2.00        | 1.00 | <b>1.00</b> | 4.33        | <b>1.00</b> | <b>0.33</b> | 3.00 | 1.69        | 2.00        | 1.00        | 4.00 | 2.00 | <b>0.25</b> | 0.58        |
|                                         | <i>Tagetes minuta</i>         | 1.50        | 1.00        | 2.00        | 1.00 | 2.00        | 0.75 | <b>0.75</b> | 1.00        | 1.50        | <b>0.50</b> | 8.00 | 1.83        | 1.50        | 1.13        | 4.00 | 2.00 | <b>0.25</b> | <b>0.46</b> |
|                                         | <i>Zingiber officinale</i>    | 2.00        | 1.33        | 2.00        | 1.50 | 2.00        | 1.00 | <b>0.25</b> | <b>0.21</b> | 2.00        | 0.67        | 8.00 | 1.83        | <b>1.00</b> | <b>0.38</b> | 2.00 | 1.50 | <b>0.25</b> | 0.58        |
| <i>Foeniculum vulgare</i><br>(fennel)   | <i>Citrus limon</i>           | 2.00        | 1.13        | 8.00        | 4.00 | 8.00        | 6.00 | 8.00        | 3.33        | 3.00        | 0.88        | 8.00 | 1.83        | <b>1.00</b> | 0.67        | 2.00 | 1.50 | <b>0.38</b> | <b>0.22</b> |
|                                         | <i>Hyssopus officinalis</i>   | 2.00        | 1.50        | 2.00        | 1.00 | 3.00        | 2.25 | 3.00        | 2.00        | 2.00        | 0.58        | 3.00 | 0.69        | 1.50        | 1.13        | 2.00 | 1.00 | <b>0.25</b> | 1.06        |
|                                         | <i>Lavandula angustifolia</i> | 2.00        | 2.00        | 8.00        | 4.00 | 8.00        | 8.00 | 8.00        | 2.33        | 3.00        | 1.25        | 8.00 | 2.67        | 2.00        | 1.67        | 2.00 | 1.00 | <b>0.13</b> | <b>0.09</b> |
|                                         | <i>Melaleuca viridiflora</i>  | 3.00        | 1.88        | 2.00        | 1.00 | 2.00        | 2.00 | 6.00        | 4.00        | 2.00        | 0.58        | 4.00 | 0.92        | <b>1.00</b> | 0.75        | 1.50 | 0.75 | <b>0.19</b> | <b>0.42</b> |
|                                         | <i>Ocimum basilicum</i>       | 2.00        | 3.00        | 8.00        | 6.00 | 8.00        | 6.00 | 2.00        | 1.00        | 3.00        | 0.88        | 8.00 | 2.00        | <b>1.00</b> | 1.00        | 2.00 | 1.50 | <b>0.13</b> | <b>0.28</b> |
|                                         | <i>Origanum vulgare</i>       | 2.00        | 2.00        | 2.00        | 1.00 | 2.00        | 1.25 | 4.00        | 2.67        | 2.00        | 0.58        | 6.00 | 2.00        | <b>1.00</b> | 0.75        | 2.00 | 1.00 | <b>0.19</b> | <b>0.14</b> |
|                                         | <i>Rosa damascena</i>         | 2.00        | 1.50        | 2.00        | 1.00 | 4.00        | 3.00 | <b>0.75</b> | 3.13        | 4.00        | 1.67        | 4.00 | 2.67        | 2.00        | 1.50        | 2.00 | 1.00 | 8.00        | 10.00       |
|                                         | <i>Rosmarinus officinalis</i> | 8.00        | 5.00        | 8.00        | 4.00 | 8.00        | 6.00 | 8.00        | 5.33        | 8.00        | 2.33        | 8.00 | 1.83        | <b>1.00</b> | 0.75        | 2.00 | 1.00 | <b>0.25</b> | 0.56        |



|                                             |                                   |             |             |             |             |             |             |             |             |             |             |             |             |             |             |             |             |             |             |
|---------------------------------------------|-----------------------------------|-------------|-------------|-------------|-------------|-------------|-------------|-------------|-------------|-------------|-------------|-------------|-------------|-------------|-------------|-------------|-------------|-------------|-------------|
|                                             | <i>Santalum austrocaledonicum</i> | <b>0.50</b> | 0.58        | <b>0.25</b> | 0.56        | <b>0.50</b> | <b>0.38</b> | <b>0.13</b> | 1.02        | <b>0.50</b> | <b>0.42</b> | 1.50        | 6.25        | <b>1.00</b> | 0.56        | 2.00        | 4.50        | <b>0.19</b> | 0.55        |
| <i>Helichrysum italicum</i><br>(immortelle) | <i>Citrus sinensis</i>            | 4.00        | 0.75        | <b>1.00</b> | <b>0.50</b> | 2.00        | 1.00        | <b>0.38</b> | <b>0.31</b> | 2.00        | 0.75        | 8.00        | 1.50        | 4.00        | 1.33        | 2.00        | 1.00        | <b>0.13</b> | 0.56        |
|                                             | <i>Lavandula angustifolia</i>     | 2.00        | 1.25        | <b>1.00</b> | <b>0.50</b> | 2.00        | 1.50        | <b>0.75</b> | <b>0.34</b> | 2.00        | 1.00        | <b>1.00</b> | <b>0.29</b> | <b>1.00</b> | <b>0.42</b> | 3.00        | 1.75        | <b>0.38</b> | 1.69        |
|                                             | <i>Lavandula burnati</i>          | 2.00        | 0.92        | <b>1.00</b> | <b>0.50</b> | 2.00        | 1.50        | <b>0.75</b> | 0.63        | 2.00        | 1.00        | 4.00        | 1.50        | <b>0.50</b> | <b>0.29</b> | 2.00        | 1.17        | <b>0.38</b> | 1.63        |
|                                             | <i>Lavandula spica</i>            | <b>1.00</b> | 0.63        | <b>1.00</b> | <b>0.50</b> | 2.00        | 1.17        | <b>0.50</b> | <b>0.25</b> | 2.00        | 0.75        | 6.00        | 1.50        | <b>0.75</b> | <b>0.31</b> | 2.00        | 1.67        | <b>0.50</b> | 2.17        |
|                                             | <i>Rosa damascena</i>             | <b>1.00</b> | <b>0.38</b> | <b>1.00</b> | <b>0.50</b> | 2.00        | 1.00        | <b>0.50</b> | 2.17        | 2.00        | 1.00        | 4.00        | 2.50        | 2.00        | 0.67        | 4.00        | 2.33        | <b>0.06</b> | <b>0.31</b> |
|                                             |                                   |             |             |             |             |             |             |             |             |             |             |             |             |             |             |             |             |             |             |
| <i>Hyssopus officinalis</i><br>(hyssop)     | <i>Citrus limon</i>               | 2.00        | 0.63        | 2.00        | 1.00        | 4.00        | 2.00        | 2.00        | 1.50        | 2.00        | <b>0.50</b> | 4.00        | <b>0.50</b> | <b>1.00</b> | <b>0.42</b> | 4.00        | 3.00        | <b>0.25</b> | 1.08        |
|                                             | <i>Citrus sinensis</i>            | 4.00        | 1.25        | 2.00        | 1.00        | 4.00        | 2.00        | <b>1.00</b> | 1.00        | 2.00        | <b>0.50</b> | 4.00        | <b>0.50</b> | 4.00        | 2.00        | 4.00        | 1.67        | <b>0.13</b> | 0.56        |
|                                             | <i>Lavandula angustifolia</i>     | 2.00        | 1.50        | 2.00        | 1.00        | 4.00        | 3.00        | 6.00        | 3.75        | 2.00        | 0.75        | 4.00        | 0.92        | <b>0.50</b> | <b>0.29</b> | 4.00        | 2.00        | <b>0.25</b> | 1.13        |
|                                             | <i>Rosmarinus officinalis</i>     | 2.00        | 0.75        | 2.00        | 1.00        | 3.00        | 1.50        | <b>1.00</b> | 1.00        | 1.50        | <b>0.38</b> | 4.00        | <b>0.50</b> | 4.00        | 2.00        | 2.00        | 1.00        | <b>0.09</b> | 0.56        |
|                                             | <i>Salvia officinalis</i>         | 2.00        | 1.17        | 2.00        | 1.00        | 3.00        | 1.50        | <b>1.00</b> | 1.00        | 2.00        | <b>0.50</b> | 8.00        | 1.83        | <b>0.50</b> | <b>0.38</b> | 2.00        | 1.00        | <b>0.25</b> | 2.00        |
|                                             | <i>Santalum austrocaledonicum</i> | <b>0.50</b> | <b>0.46</b> | <b>0.25</b> | 0.56        | <b>0.19</b> | <b>0.09</b> | <b>0.63</b> | 5.31        | 1.50        | 1.19        | 2.00        | 8.13        | <b>1.00</b> | <b>0.31</b> | <b>1.00</b> | 2.25        | <b>0.25</b> | 1.67        |
| <i>Illicium verum</i><br>(star anise)       | <i>Carum carvi</i>                | 2.00        | 1.50        | 2.00        | 1.00        | 2.00        | 1.00        | 2.00        | 1.50        | 2.00        | 1.58        | 4.00        | 2.67        | <b>0.50</b> | <b>0.38</b> | 2.00        | 1.00        | <b>0.50</b> | 0.56        |
|                                             | <i>Coriandrum sativum</i>         | <b>1.00</b> | 1.50        | <b>0.25</b> | <b>0.19</b> | <b>0.50</b> | <b>0.38</b> | <b>0.50</b> | 1.25        | 2.00        | 1.83        | 2.00        | 3.33        | <b>0.75</b> | 1.13        | 2.00        | 1.17        | <b>0.13</b> | 2.02        |
|                                             | <i>Cupressus sempervirens</i>     | 2.00        | 1.33        | 2.00        | 1.00        | 2.00        | 0.63        | 2.00        | 1.33        | 2.00        | 1.58        | 3.00        | 1.50        | <b>1.00</b> | 0.75        | 2.00        | 0.63        | 2.00        | 2.25        |
|                                             | <i>Elettaria cardamonum</i>       | 2.00        | 2.00        | 2.00        | 1.00        | 2.00        | 1.00        | 3.00        | 2.25        | 2.00        | 1.46        | 4.00        | 2.00        | <b>0.50</b> | <b>0.50</b> | <b>0.75</b> | <b>0.38</b> | <b>0.50</b> | <b>0.23</b> |
|                                             | <i>Foeniculum vulgare</i>         | 2.00        | 2.00        | 2.00        | 1.00        | 2.00        | 1.50        | 2.00        | 1.33        | 2.00        | 1.67        | 4.00        | 2.00        | <b>1.00</b> | 1.00        | 2.00        | 1.00        | <b>0.50</b> | <b>0.19</b> |
|                                             |                                   |             |             |             |             |             |             |             |             |             |             |             |             |             |             |             |             |             |             |
| <i>Juniperus virginiana</i><br>(cedarwood)  | <i>Cinnamomum zeylanicum</i>      | <b>1.00</b> | 1.50        | <b>0.50</b> | 0.75        | <b>1.00</b> | <b>0.50</b> | <b>0.25</b> | 1.17        | <b>0.50</b> | <b>0.25</b> | <b>0.50</b> | 0.83        | 1.50        | 1.13        | 2.00        | 3.00        | <b>0.06</b> | <b>0.10</b> |
|                                             | <i>Citrus bergamia</i>            | 2.00        | 2.13        | <b>1.00</b> | 0.75        | 2.00        | 1.00        | <b>0.50</b> | 1.42        | <b>0.50</b> | <b>0.19</b> | 2.00        | 2.33        | 4.00        | 1.67        | <b>1.00</b> | 0.56        | <b>0.50</b> | 0.75        |
|                                             | <i>Citrus limon</i>               | <b>1.00</b> | 1.06        | <b>1.00</b> | 0.75        | 2.00        | 1.00        | 2.00        | 5.83        | 2.00        | 0.75        | <b>1.00</b> | 1.06        | 2.00        | 0.83        | 4.00        | 4.00        | <b>0.13</b> | <b>0.17</b> |
|                                             | <i>Commiphora molmol</i>          | <b>1.00</b> | 1.13        | <b>1.00</b> | 0.75        | 2.00        | 1.50        | <b>0.75</b> | 4.00        | <b>1.00</b> | 0.75        | <b>0.75</b> | 2.25        | 3.00        | 0.94        | 2.00        | 1.50        | 8.00        | 16.00       |
|                                             | <i>Cymbopogon citratus</i>        | <b>0.50</b> | 0.75        | <b>0.50</b> | <b>0.38</b> | 2.00        | 1.50        | <b>0.75</b> | 3.00        | <b>0.50</b> | <b>0.25</b> | <b>0.50</b> | 0.67        | 2.00        | 0.63        | 4.00        | 3.00        | <b>0.09</b> | <b>0.10</b> |
|                                             | <i>Lavandula angustifolia</i>     | <b>1.00</b> | 1.50        | <b>0.75</b> | 0.56        | 2.00        | 1.50        | 8.00        | 22.33       | <b>1.00</b> | <b>0.50</b> | 1.50        | 1.75        | 4.00        | 2.33        | 2.00        | 1.50        | <b>0.19</b> | <b>0.28</b> |
|                                             | <i>Mentha piperita</i>            | <b>1.00</b> | 1.50        | <b>0.50</b> | <b>0.38</b> | 2.00        | 0.75        | <b>0.38</b> | 1.13        | <b>0.75</b> | <b>0.28</b> | <b>0.50</b> | 0.63        | 2.00        | 1.50        | 2.00        | 1.50        | <b>0.25</b> | <b>0.33</b> |

|                                             |                                   |             |             |             |             |             |             |             |             |             |             |             |             |             |             |             |             |             |             |
|---------------------------------------------|-----------------------------------|-------------|-------------|-------------|-------------|-------------|-------------|-------------|-------------|-------------|-------------|-------------|-------------|-------------|-------------|-------------|-------------|-------------|-------------|
|                                             | <i>Origanum vulgare</i>           | <b>1.00</b> | 1.06        | <b>1.00</b> | 0.75        | 2.00        | 1.00        | 1.50        | 4.75        | <b>1.00</b> | <b>0.42</b> | 2.00        | 2.33        | 8.00        | 4.00        | 2.00        | 1.50        | <b>0.13</b> | <b>0.16</b> |
|                                             | <i>Pinus sylvestris</i>           | <b>1.00</b> | 1.25        | <b>1.00</b> | 0.75        | 2.00        | 1.50        | <b>1.00</b> | 3.00        | <b>1.00</b> | <b>0.31</b> | <b>1.00</b> | 1.06        | 4.00        | 2.00        | 2.00        | 1.50        | <b>0.06</b> | <b>0.31</b> |
|                                             | <i>Rosa damascena</i>             | <b>0.50</b> | 0.63        | <b>0.50</b> | <b>0.38</b> | 2.00        | 1.00        | 1.50        | 10.00       | <b>0.50</b> | <b>0.25</b> | <b>0.75</b> | 1.13        | 2.00        | 1.00        | 2.00        | 1.50        | <b>0.06</b> | <b>0.13</b> |
|                                             | <i>Rosmarinus officinalis</i>     | <b>1.00</b> | 1.13        | <b>1.00</b> | 0.75        | 4.00        | 2.00        | <b>0.75</b> | 2.38        | <b>1.00</b> | <b>0.38</b> | <b>0.50</b> | 0.53        | 2.00        | 1.00        | 2.00        | 1.50        | <b>0.09</b> | <b>0.28</b> |
|                                             | <i>Santalum austrocaledonicum</i> | <b>0.25</b> | <b>0.42</b> | <b>0.50</b> | 1.25        | 2.00        | 1.00        | <b>0.25</b> | 2.67        | <b>0.25</b> | <b>0.23</b> | <b>0.06</b> | <b>0.32</b> | 3.00        | 0.94        | 2.00        | 5.00        | <b>0.50</b> | 1.83        |
|                                             | <i>Styrax benzoin</i>             | <b>1.00</b> | 1.13        | <b>0.50</b> | <b>0.38</b> | <b>1.00</b> | <b>0.38</b> | <b>0.38</b> | 1.13        | <b>0.50</b> | <b>0.19</b> | 1.50        | 1.88        | 4.00        | 2.00        | 2.00        | 1.50        | <b>0.25</b> | 0.58        |
|                                             | <i>Thymus vulgaris</i>            | <b>1.00</b> | 1.13        | <b>0.50</b> | <b>0.50</b> | <b>1.00</b> | 0.75        | <b>0.50</b> | 1.83        | <b>0.75</b> | <b>0.28</b> | <b>0.25</b> | <b>0.50</b> | 3.00        | 1.50        | 2.00        | 2.00        | <b>0.13</b> | <b>0.46</b> |
|                                             | <i>Zingiber officinale</i>        | 1.50        | 2.25        | <b>0.75</b> | 0.75        | 2.00        | 1.00        | 2.00        | 6.33        | <b>0.75</b> | <b>0.38</b> | <b>1.00</b> | 1.17        | <b>1.00</b> | <b>0.38</b> | 4.00        | 4.00        | <b>0.50</b> | 1.00        |
| <i>Laurus nobilis</i><br>(bay)              | <i>Citrus limon</i>               | 2.00        | 1.13        | 8.00        | 4.00        | 8.00        | 3.00        | 8.00        | 3.33        | 2.00        | <b>0.50</b> | 3.00        | 0.56        | 3.00        | 1.50        | 2.00        | 1.13        | <b>0.13</b> | <b>0.06</b> |
|                                             | <i>Citrus sinensis</i>            | 2.00        | 1.13        | 8.00        | 4.00        | 8.00        | 3.00        | 8.00        | 5.33        | 2.00        | <b>0.50</b> | 6.00        | 1.13        | 2.00        | 1.17        | 2.00        | <b>0.46</b> | <b>0.13</b> | <b>0.08</b> |
|                                             | <i>Coriandrum sativum</i>         | <b>0.50</b> | 0.75        | <b>0.13</b> | <b>0.09</b> | <b>1.00</b> | 0.63        | <b>0.75</b> | 1.63        | <b>1.00</b> | <b>0.38</b> | <b>0.19</b> | <b>0.27</b> | <b>1.00</b> | 1.33        | 4.00        | 1.58        | <b>0.06</b> | 1.01        |
|                                             | <i>Eucalyptus globulus</i>        | <b>1.00</b> | 0.63        | 4.00        | 2.00        | 8.00        | 3.67        | <b>0.63</b> | <b>0.26</b> | 2.00        | <b>0.50</b> | <b>1.00</b> | <b>0.29</b> | <b>1.00</b> | 0.58        | 2.00        | 0.63        | <b>0.19</b> | <b>0.12</b> |
|                                             | <i>Juniperus virginiana</i>       | <b>0.50</b> | 0.75        | <b>1.00</b> | 0.75        | 8.00        | 3.00        | <b>0.19</b> | 0.53        | <b>1.00</b> | <b>0.38</b> | 1.50        | 1.69        | 1.50        | 0.88        | 2.00        | 1.13        | <b>0.13</b> | <b>0.14</b> |
|                                             | <i>Lavandula angustifolia</i>     | <b>1.00</b> | 1.00        | 4.00        | 2.00        | 8.00        | 5.00        | 8.00        | 2.33        | 1.50        | 0.56        | 4.00        | 1.17        | 1.50        | 1.00        | 2.00        | 0.63        | <b>0.38</b> | <b>0.23</b> |
|                                             | <i>Origanum vulgare</i>           | <b>1.00</b> | 0.56        | 2.00        | 1.00        | 4.00        | 1.50        | 6.00        | 4.00        | 2.00        | 0.58        | 4.00        | 1.17        | 2.00        | 1.17        | 3.00        | 0.94        | <b>0.13</b> | <b>0.05</b> |
|                                             | <i>Rosmarinus officinalis</i>     | <b>1.00</b> | 0.63        | 4.00        | 2.00        | 8.00        | 3.00        | 8.00        | 5.33        | 2.00        | <b>0.50</b> | 2.00        | <b>0.38</b> | <b>1.00</b> | 0.58        | 2.00        | 0.63        | <b>0.13</b> | <b>0.27</b> |
|                                             | <i>Salvia officinalis</i>         | 2.00        | 1.67        | 4.00        | 2.00        | 8.00        | 3.00        | 8.00        | 5.33        | 1.50        | <b>0.38</b> | 2.00        | 0.58        | <b>0.50</b> | <b>0.42</b> | 4.00        | 1.25        | <b>0.25</b> | 1.03        |
| <i>Lavandula angustifolia</i><br>(lavender) | <i>Thymus vulgaris</i>            | <b>1.00</b> | 0.63        | <b>1.00</b> | 0.75        | <b>1.00</b> | 0.63        | 8.00        | 9.33        | <b>1.00</b> | <b>0.25</b> | <b>0.50</b> | 0.56        | <b>0.75</b> | <b>0.44</b> | 2.00        | 1.13        | <b>0.38</b> | 1.05        |
|                                             | <i>Zingiber officinale</i>        | <b>1.00</b> | 1.00        | 2.00        | 1.50        | 8.00        | 3.00        | <b>0.25</b> | <b>0.17</b> | <b>1.00</b> | <b>0.38</b> | <b>0.75</b> | <b>0.22</b> | 1.50        | 0.69        | 8.00        | 4.50        | <b>0.25</b> | <b>0.28</b> |
|                                             | <i>Citrus aurantifolia</i>        | 3.00        | 1.88        | 2.00        | 1.00        | 2.00        | 1.50        | 2.00        | 0.75        | <b>1.00</b> | <b>0.38</b> | 2.00        | <b>0.46</b> | <b>1.00</b> | 0.58        | 2.00        | 1.00        | <b>0.25</b> | <b>0.29</b> |
|                                             | <i>Citrus limon</i>               | 2.00        | 1.13        | 2.00        | 1.00        | 8.00        | 6.00        | 2.00        | 0.75        | 2.00        | 0.75        | 2.00        | <b>0.46</b> | 2.00        | 1.00        | 3.00        | 2.25        | <b>0.25</b> | <b>0.21</b> |
|                                             | <i>Citrus sinensis</i>            | 1.50        | 0.84        | 2.00        | 1.00        | 4.00        | 3.00        | 2.00        | 1.25        | 2.00        | 0.75        | 2.00        | <b>0.46</b> | 8.00        | 4.67        | 2.00        | 0.83        | <b>0.13</b> | <b>0.13</b> |
|                                             | <i>Commiphora molmol</i>          | 2.00        | 1.25        | 2.00        | 1.00        | 3.00        | 3.00        | 1.50        | 4.19        | <b>1.00</b> | 0.75        | 2.00        | 4.33        | <b>1.00</b> | <b>0.40</b> | 2.00        | 1.00        | <b>0.50</b> | 0.75        |
|                                             | <i>Melaleuca alternifolia</i>     | 2.00        | 1.25        | <b>1.00</b> | 0.58        | 2.00        | 1.50        | 3.00        | 1.38        | 2.00        | 0.75        | 2.00        | 1.00        | 4.00        | 1.83        | <b>1.00</b> | <b>0.50</b> | <b>0.75</b> | 0.88        |

|                                            |                                   |             |             |             |             |             |             |             |             |             |             |             |             |             |             |             |             |             |             |
|--------------------------------------------|-----------------------------------|-------------|-------------|-------------|-------------|-------------|-------------|-------------|-------------|-------------|-------------|-------------|-------------|-------------|-------------|-------------|-------------|-------------|-------------|
|                                            | <i>Melaleuca viridiflora</i>      | 2.00        | 1.25        | 2.00        | 1.00        | 2.00        | 2.00        | 2.00        | 1.25        | 1.50        | 0.56        | 2.00        | <b>0.46</b> | 8.00        | 4.67        | 2.00        | 1.00        | <b>0.19</b> | <b>0.47</b> |
|                                            | <i>Origanum vulgare</i>           | 2.00        | 1.13        | <b>1.00</b> | <b>0.50</b> | 2.00        | 1.50        | 2.00        | 1.25        | 1.50        | 0.63        | 3.00        | 1.00        | 1.50        | 0.88        | 4.00        | 2.00        | <b>0.25</b> | <b>0.19</b> |
|                                            | <i>Pimenta racemosa</i>           | 1.50        | 2.25        | <b>1.00</b> | <b>0.50</b> | 3.00        | 3.00        | <b>0.75</b> | 0.84        | <b>0.75</b> | <b>0.38</b> | 2.00        | 1.00        | 1.50        | 2.00        | 1.50        | 1.13        | <b>0.13</b> | <b>0.31</b> |
|                                            | <i>Pinus sylvestris</i>           | 2.00        | 1.50        | 2.00        | 1.00        | 4.00        | 4.00        | 1.50        | 0.69        | 1.50        | <b>0.47</b> | 1.50        | <b>0.34</b> | 8.00        | 4.67        | 2.00        | 1.00        | <b>0.19</b> | 0.84        |
|                                            | <i>Rosmarinus officinalis</i>     | 3.00        | 1.88        | 2.00        | 1.00        | 4.00        | 3.00        | 3.00        | 1.88        | 2.00        | 0.75        | 3.00        | 0.69        | 1.50        | 0.88        | 2.00        | 1.00        | <b>0.19</b> | <b>0.47</b> |
|                                            | <i>Thymus vulgaris</i>            | 1.50        | 0.94        | <b>1.00</b> | 0.75        | <b>1.00</b> | 1.00        | 2.00        | 2.25        | <b>1.00</b> | <b>0.38</b> | 3.00        | 3.50        | 1.50        | 0.88        | 1.50        | 1.13        | <b>0.19</b> | 0.59        |
| <i>Lavandula burnati</i><br>(lavandin)     | <i>Citrus limon</i>               | 2.00        | 0.79        | 2.00        | 1.00        | 4.00        | 3.00        | 3.00        | 2.25        | 2.00        | 0.75        | <b>0.50</b> | <b>0.16</b> | <b>1.00</b> | 0.67        | 2.00        | 1.50        | <b>0.38</b> | <b>0.25</b> |
|                                            | <i>Citrus sinensis</i>            | 2.00        | 0.79        | 2.00        | 1.00        | 4.00        | 3.00        | 3.00        | 3.00        | 2.00        | 0.75        | 2.00        | 0.63        | <b>1.00</b> | 0.75        | 2.00        | 0.83        | <b>0.19</b> | <b>0.16</b> |
| <i>Lavandula spica</i><br>(lavender spike) | <i>Citrus limon</i>               | 2.00        | 1.13        | <b>1.00</b> | <b>0.50</b> | 4.00        | 2.33        | <b>1.00</b> | <b>0.42</b> | 8.00        | 2.00        | 4.00        | 0.75        | <b>1.00</b> | <b>0.50</b> | 2.00        | 2.00        | <b>0.25</b> | <b>0.17</b> |
|                                            | <i>Citrus sinensis</i>            | 2.00        | 1.13        | <b>1.00</b> | <b>0.50</b> | 4.00        | 2.33        | 1.50        | 1.00        | 2.00        | <b>0.50</b> | 4.00        | 0.75        | <b>1.00</b> | 0.58        | 4.00        | 2.67        | <b>0.25</b> | <b>0.21</b> |
| <i>Melaleuca cajuputii</i><br>(cajeput)    | <i>Citrus bergamia</i>            | 4.00        | 0.75        | <b>1.00</b> | <b>0.50</b> | 2.00        | 0.83        | 2.00        | 0.58        | 2.00        | <b>0.50</b> | 1.50        | 1.00        | 2.00        | 0.83        | 2.00        | 0.63        | <b>0.25</b> | 1.13        |
|                                            | <i>Citrus limon</i>               | 2.00        | <b>0.38</b> | <b>1.00</b> | <b>0.50</b> | 2.00        | 0.83        | 4.00        | 1.50        | 2.00        | <b>0.50</b> | 8.00        | 4.50        | 2.00        | 0.83        | 4.00        | 3.00        | 3.00        | 13.00       |
|                                            | <i>Elettaria cardamomum</i>       | 2.00        | 1.25        | <b>1.00</b> | <b>0.50</b> | 2.00        | 0.83        | 2.00        | 0.75        | 1.50        | <b>0.28</b> | 3.00        | 2.00        | <b>1.00</b> | 0.75        | 2.00        | 1.00        | <b>0.25</b> | 1.08        |
|                                            | <i>Eucalyptus globulus</i>        | 2.00        | <b>0.50</b> | <b>1.00</b> | <b>0.50</b> | 2.00        | 1.00        | 3.00        | 1.13        | 2.00        | <b>0.50</b> | 8.00        | 5.33        | 2.00        | 1.00        | 2.00        | 1.00        | 2.00        | 9.00        |
|                                            | <i>Helichrysum italicum</i>       | 2.00        | <b>0.50</b> | 2.00        | 1.00        | 2.00        | 0.83        | 2.00        | 0.92        | 1.50        | 0.56        | 6.00        | 3.75        | 2.00        | 0.67        | 3.00        | 1.75        | <b>0.13</b> | 1.00        |
|                                            | <i>Hyssopus officinalis</i>       | 8.00        | 3.00        | <b>1.00</b> | <b>0.50</b> | 1.50        | 0.63        | 2.00        | 1.25        | 2.00        | <b>0.50</b> | 4.00        | 2.25        | 1.50        | 0.75        | 2.00        | 1.00        | 2.00        | 16.00       |
|                                            | <i>Lavandula angustifolia</i>     | 3.00        | 1.88        | <b>1.00</b> | <b>0.50</b> | 2.00        | 1.33        | 2.00        | <b>0.50</b> | 2.00        | 0.75        | 8.00        | 5.33        | <b>1.00</b> | 0.58        | 4.00        | 2.00        | <b>0.25</b> | 1.13        |
|                                            | <i>Melaleuca viridiflora</i>      | 2.00        | <b>0.50</b> | <b>1.00</b> | <b>0.50</b> | 2.00        | 1.33        | 2.00        | 1.25        | 2.00        | <b>0.50</b> | 4.00        | 2.25        | <b>1.00</b> | <b>0.50</b> | 3.00        | 1.50        | <b>1.00</b> | 6.00        |
|                                            | <i>Myrtus communis</i>            | 2.00        | <b>0.50</b> | <b>1.00</b> | <b>0.50</b> | 2.00        | 0.83        | 2.00        | <b>0.38</b> | <b>0.75</b> | <b>0.16</b> | 8.00        | 4.67        | 2.00        | 1.00        | 4.00        | 2.00        | <b>0.25</b> | 1.06        |
|                                            | <i>Pinus sylvestris</i>           | 2.00        | 0.75        | <b>1.00</b> | <b>0.50</b> | 2.00        | 1.33        | 2.00        | 0.92        | <b>1.00</b> | <b>0.19</b> | 8.00        | 4.50        | 4.00        | 2.00        | 2.00        | 1.00        | 6.00        | 48.00       |
|                                            | <i>Rosa damascena</i>             | 2.00        | 0.75        | <b>1.00</b> | <b>0.50</b> | 2.00        | 0.83        | <b>1.00</b> | 4.13        | <b>1.00</b> | <b>0.38</b> | 4.00        | 4.00        | 1.50        | 0.75        | 2.00        | 1.00        | <b>0.50</b> | 2.50        |
|                                            | <i>Rosmarinus officinalis</i>     | <b>1.00</b> | <b>0.25</b> | 8.00        | 4.00        | 2.00        | 0.83        | 2.00        | 1.25        | 1.50        | <b>0.38</b> | 8.00        | 4.50        | 2.00        | 1.00        | <b>0.50</b> | <b>0.25</b> | 1.50        | 9.00        |
|                                            | <i>Santalum austrocaledonicum</i> | <b>0.50</b> | <b>0.40</b> | <b>0.13</b> | <b>0.28</b> | <b>1.00</b> | <b>0.42</b> | <b>0.25</b> | 2.03        | <b>0.25</b> | <b>0.20</b> | <b>0.19</b> | 0.84        | 2.00        | 0.63        | 2.00        | 4.50        | <b>0.50</b> | 3.33        |
|                                            | <i>Syzygium caryophyllata</i>     | <b>1.00</b> | <b>0.38</b> | <b>1.00</b> | 0.75        | 2.00        | 1.33        | 2.00        | 0.75        | 2.00        | 0.75        | 2.00        | 5.00        | 2.00        | 1.00        | 2.00        | 1.50        | <b>0.19</b> | 2.25        |

|                                           |                                   |      |      |      |      |      |      |      |      |      |      |      |      |      |      |      |      |      |      |
|-------------------------------------------|-----------------------------------|------|------|------|------|------|------|------|------|------|------|------|------|------|------|------|------|------|------|
|                                           | <i>Thymus vulgaris</i>            | 3.00 | 0.75 | 1.00 | 0.75 | 1.00 | 0.67 | 2.00 | 2.25 | 1.00 | 0.25 | 1.00 | 1.50 | 2.00 | 1.00 | 2.00 | 1.50 | 0.50 | 3.33 |
|                                           | <i>Zingiber officinale</i>        | 2.00 | 1.25 | 0.50 | 0.38 | 2.00 | 0.83 | 1.50 | 0.94 | 1.00 | 0.38 | 4.00 | 2.67 | 1.00 | 0.38 | 3.00 | 2.25 | 0.38 | 1.88 |
| <i>Melaleuca viridiflora</i><br>(niaouli) | <i>Citrus sinensis</i>            | 3.00 | 0.56 | 2.00 | 1.00 | 4.00 | 3.00 | 2.00 | 2.00 | 2.00 | 0.50 | 8.00 | 1.00 | 4.00 | 2.00 | 1.00 | 0.42 | 0.38 | 0.94 |
|                                           | <i>Mentha piperita</i>            | 2.00 | 1.25 | 1.00 | 0.50 | 2.00 | 1.25 | 1.00 | 0.83 | 1.00 | 0.25 | 8.00 | 2.50 | 4.00 | 3.00 | 2.00 | 1.00 | 0.50 | 1.17 |
|                                           | <i>Pinus sylvestris</i>           | 2.00 | 0.75 | 2.00 | 1.00 | 4.00 | 4.00 | 2.00 | 1.67 | 2.00 | 0.38 | 8.00 | 1.00 | 2.00 | 1.00 | 2.00 | 1.00 | 0.50 | 3.00 |
|                                           | <i>Rosmarinus officinalis</i>     | 3.00 | 0.75 | 2.00 | 1.00 | 2.00 | 1.50 | 1.50 | 1.50 | 2.00 | 0.50 | 8.00 | 1.00 | 4.00 | 2.00 | 2.00 | 1.00 | 0.75 | 3.00 |
|                                           | <i>Salvia officinalis</i>         | 8.00 | 3.67 | 2.00 | 1.00 | 2.00 | 1.50 | 1.00 | 1.00 | 2.00 | 0.50 | 8.00 | 1.83 | 8.00 | 6.00 | 2.00 | 1.00 | 0.50 | 3.00 |
|                                           | <i>Thymus vulgaris</i>            | 1.50 | 0.94 | 1.00 | 0.50 | 3.00 | 1.13 | 1.50 | 1.25 | 1.50 | 0.38 | 4.00 | 1.25 | 1.50 | 1.13 | 2.00 | 1.00 | 1.00 | 2.33 |
| <i>Mentha piperita</i><br>(peppermint)    | <i>Rosmarinus officinalis</i>     | 1.50 | 0.94 | 1.00 | 0.50 | 3.00 | 1.13 | 1.50 | 1.25 | 1.50 | 0.38 | 4.00 | 1.25 | 1.50 | 1.13 | 2.00 | 1.00 | 1.00 | 2.33 |
|                                           | <i>Santalum austrocaledonicum</i> | 1.00 | 1.17 | 0.13 | 0.28 | 0.25 | 0.09 | 0.09 | 0.78 | 0.50 | 0.40 | 0.50 | 2.13 | 1.00 | 0.56 | 2.00 | 4.50 | 0.50 | 1.50 |
|                                           | <i>Thymus vulgaris</i>            | 1.50 | 0.94 | 1.00 | 0.75 | 1.00 | 0.63 | 1.00 | 1.33 | 1.50 | 0.38 | 2.00 | 2.50 | 1.00 | 0.75 | 2.00 | 1.50 | 1.00 | 3.00 |
| <i>Myrtus communis</i><br>(myrtle)        | <i>Melaleuca alternifolia</i>     | 2.00 | 0.50 | 1.00 | 0.58 | 1.00 | 0.50 | 2.00 | 0.79 | 2.00 | 0.42 | 4.00 | 1.67 | 1.00 | 0.38 | 1.00 | 0.50 | 0.25 | 0.23 |
|                                           | <i>Mentha piperita</i>            | 2.00 | 1.25 | 1.00 | 0.50 | 2.00 | 0.75 | 2.00 | 0.79 | 2.00 | 0.42 | 6.00 | 2.00 | 4.00 | 3.00 | 2.00 | 1.00 | 0.38 | 0.22 |
|                                           | <i>Rosmarinus officinalis</i>     | 2.00 | 0.50 | 2.00 | 1.00 | 2.00 | 1.00 | 4.00 | 2.25 | 2.00 | 0.42 | 8.00 | 1.17 | 4.00 | 2.00 | 2.00 | 1.00 | 0.50 | 1.13 |
|                                           | <i>Thymus vulgaris</i>            | 1.00 | 0.25 | 0.50 | 0.38 | 1.00 | 0.75 | 1.50 | 1.59 | 1.00 | 0.21 | 2.00 | 2.17 | 3.00 | 1.50 | 2.00 | 1.50 | 0.25 | 0.73 |
| <i>Ocimum basilicum</i><br>(basil)        | <i>Citrus aurantifolia</i>        | 1.00 | 1.13 | 4.00 | 3.00 | 2.00 | 1.00 | 2.00 | 1.17 | 2.00 | 0.50 | 2.00 | 0.29 | 2.00 | 1.50 | 8.00 | 6.00 | 0.13 | 0.33 |
|                                           | <i>Citrus bergamia</i>            | 1.00 | 1.06 | 4.00 | 3.00 | 4.00 | 2.00 | 2.00 | 1.00 | 1.50 | 0.38 | 3.00 | 0.75 | 1.00 | 0.67 | 2.00 | 1.13 | 0.13 | 0.31 |
|                                           | <i>Cymbopogon citratus</i>        | 0.50 | 0.75 | 2.00 | 1.50 | 2.00 | 1.50 | 0.19 | 0.31 | 1.50 | 0.56 | 1.50 | 0.63 | 1.00 | 0.56 | 4.00 | 3.00 | 0.13 | 0.26 |
|                                           | <i>Eucalyptus globulus</i>        | 1.00 | 1.13 | 4.00 | 3.00 | 4.00 | 2.33 | 4.00 | 2.33 | 2.00 | 0.50 | 6.00 | 1.50 | 1.50 | 1.13 | 8.00 | 6.00 | 0.19 | 0.47 |
|                                           | <i>Hyssopus officinalis</i>       | 1.00 | 1.25 | 4.00 | 3.00 | 4.00 | 2.00 | 1.50 | 1.25 | 1.50 | 0.38 | 1.50 | 0.22 | 1.00 | 0.75 | 8.00 | 6.00 | 0.75 | 4.50 |
|                                           | <i>Juniperus virginiana</i>       | 0.50 | 1.00 | 0.50 | 0.50 | 2.00 | 1.00 | 0.50 | 1.50 | 1.50 | 0.56 | 2.00 | 2.17 | 1.00 | 0.75 | 2.00 | 2.00 | 0.13 | 0.38 |
|                                           | <i>Lavandula angustifolia</i>     | 1.00 | 1.50 | 4.00 | 3.00 | 2.00 | 1.50 | 2.00 | 0.92 | 2.00 | 0.75 | 1.00 | 0.25 | 1.00 | 0.83 | 8.00 | 6.00 | 0.25 | 0.63 |
|                                           | <i>Melaleuca alternifolia</i>     | 1.00 | 1.13 | 2.00 | 1.67 | 2.00 | 1.00 | 0.63 | 0.42 | 1.00 | 0.25 | 0.75 | 0.31 | 1.50 | 0.94 | 2.00 | 1.50 | 0.13 | 0.33 |
|                                           | <i>Melaleuca viridiflora</i>      | 0.50 | 0.56 | 4.00 | 3.00 | 2.00 | 1.50 | 1.50 | 1.25 | 2.00 | 0.50 | 8.00 | 1.17 | 1.00 | 0.75 | 2.00 | 1.50 | 0.25 | 1.00 |
|                                           | <i>Origanum vulgare</i>           | 0.50 | 0.53 | 8.00 | 6.00 | 2.00 | 1.00 | 2.00 | 1.67 | 2.00 | 0.58 | 0.75 | 0.19 | 1.00 | 0.75 | 4.00 | 3.00 | 0.13 | 0.28 |

|                                     |                                   |             |             |             |             |             |             |             |             |             |             |             |             |             |             |             |             |             |             |
|-------------------------------------|-----------------------------------|-------------|-------------|-------------|-------------|-------------|-------------|-------------|-------------|-------------|-------------|-------------|-------------|-------------|-------------|-------------|-------------|-------------|-------------|
|                                     | <i>Origanum vulgare</i>           | <b>0.50</b> | 0.75        | 4.00        | 3.00        | 4.00        | 1.50        | 2.00        | 1.67        | 2.00        | <b>0.50</b> | 2.00        | <b>0.50</b> | <b>1.00</b> | 0.75        | 4.00        | 3.00        | <b>0.25</b> | 0.63        |
|                                     | <i>Piper nigrum</i>               | <b>1.00</b> | 1.06        | 8.00        | 6.00        | 2.00        | 0.83        | <b>0.75</b> | <b>0.38</b> | 2.00        | <b>0.50</b> | 8.00        | 2.67        | <b>1.00</b> | 0.75        | 4.00        | 3.00        | <b>0.13</b> | <b>0.50</b> |
|                                     | <i>Rosmarinus officinalis</i>     | <b>0.50</b> | 0.56        | 4.00        | 3.00        | 2.00        | 1.00        | 1.50        | 1.25        | 2.00        | <b>0.50</b> | 8.00        | 1.17        | <b>1.00</b> | 0.75        | 4.00        | 3.00        | <b>0.19</b> | 0.75        |
|                                     | <i>Salvia officinalis</i>         | <b>1.00</b> | 1.33        | 4.00        | 3.00        | 2.00        | 1.00        | <b>1.00</b> | 0.83        | 1.50        | <b>0.38</b> | 8.00        | 2.00        | 1.50        | 1.50        | 8.00        | 6.00        | <b>0.13</b> | 0.75        |
|                                     | <i>Santalum austrocaledonicum</i> | <b>0.50</b> | 0.83        | <b>0.13</b> | <b>0.31</b> | 2.00        | 1.00        | <b>0.63</b> | 5.21        | <b>0.50</b> | <b>0.40</b> | <b>0.19</b> | 0.77        | <b>0.50</b> | <b>0.28</b> | <b>0.50</b> | 1.25        | <b>0.38</b> | 1.75        |
| Origanum<br>marjorana<br>(marjoram) | <i>Citrus sinensis</i>            | 2.00        | <b>0.25</b> | 2.00        | 1.00        | 4.00        | 2.00        | 1.50        | 1.50        | 2.00        | 0.58        | 8.00        | 1.83        | 8.00        | 4.00        | 2.00        | 0.83        | <b>0.13</b> | <b>0.09</b> |
|                                     | <i>Melaleuca alternifolia</i>     | 2.00        | <b>0.38</b> | <b>1.00</b> | 0.58        | 1.50        | 0.75        | 2.00        | 1.67        | 3.00        | 0.88        | 4.00        | 2.00        | <b>1.00</b> | <b>0.38</b> | <b>1.00</b> | <b>0.50</b> | <b>0.25</b> | <b>0.23</b> |
|                                     | <i>Rosmarinus officinalis</i>     | 2.00        | <b>0.38</b> | <b>0.50</b> | <b>0.25</b> | <b>1.00</b> | <b>0.50</b> | 3.00        | 3.00        | 2.00        | 0.58        | 8.00        | 1.83        | 8.00        | 4.00        | 2.00        | 1.00        | <b>0.13</b> | <b>0.28</b> |
|                                     | <i>Santalum austrocaledonicum</i> | <b>0.50</b> | <b>0.36</b> | <b>0.13</b> | <b>0.28</b> | <b>0.50</b> | <b>0.25</b> | <b>0.06</b> | 0.53        | <b>1.00</b> | 0.83        | 4.00        | 16.67       | <b>1.00</b> | <b>0.31</b> | 2.00        | 4.50        | <b>0.13</b> | <b>0.36</b> |
| Origanum<br>vulgare<br>(origanum)   | <i>Melaleuca alternifolia</i>     | 2.00        | 1.25        | <b>1.00</b> | 0.58        | <b>1.00</b> | <b>0.38</b> | 2.00        | 1.67        | 2.00        | <b>0.50</b> | 4.00        | 2.00        | <b>1.00</b> | <b>0.38</b> | 3.00        | 1.50        | <b>0.50</b> | 0.58        |
|                                     | <i>Pinus sylvestris</i>           | 2.00        | 1.50        | 2.00        | 1.00        | 2.00        | 1.25        | 2.00        | 1.67        | <b>1.00</b> | <b>0.19</b> | 8.00        | 1.83        | 2.00        | 1.00        | 2.00        | 1.00        | <b>0.50</b> | 2.25        |
|                                     | <i>Rosmarinus officinalis</i>     | 2.00        | 1.25        | 2.00        | 1.00        | 2.00        | 0.75        | 2.00        | 2.00        | <b>1.00</b> | <b>0.25</b> | 8.00        | 1.83        | <b>1.00</b> | <b>0.50</b> | 3.00        | 1.50        | <b>0.50</b> | 1.25        |
| Pinus sylvestris<br>(pine)          | <i>Melaleuca alternifolia</i>     | <b>1.00</b> | <b>0.38</b> | <b>1.00</b> | 0.58        | <b>0.50</b> | <b>0.38</b> | 2.00        | 1.33        | <b>1.00</b> | <b>0.19</b> | <b>0.75</b> | <b>0.30</b> | 2.00        | 0.75        | 2.00        | 1.00        | <b>0.25</b> | 1.17        |
|                                     | <i>Pimenta racemosa</i>           | <b>1.00</b> | 1.25        | <b>1.00</b> | <b>0.50</b> | 2.00        | 2.00        | 1.50        | 2.00        | <b>1.00</b> | <b>0.31</b> | 4.00        | 1.58        | <b>0.75</b> | 0.94        | <b>1.00</b> | 0.75        | <b>0.50</b> | 3.00        |
|                                     | <i>Rosmarinus officinalis</i>     | 2.00        | 0.75        | 2.00        | 1.00        | 4.00        | 3.00        | 3.00        | 2.50        | 4.00        | 0.75        | 8.00        | 1.00        | 8.00        | 4.00        | 2.00        | 1.00        | <b>0.25</b> | 1.50        |
|                                     | <i>Santalum austrocaledonicum</i> | <b>1.00</b> | 0.92        | <b>0.13</b> | <b>0.28</b> | <b>0.50</b> | <b>0.38</b> | <b>0.25</b> | 2.08        | <b>0.50</b> | <b>0.36</b> | <b>0.50</b> | 2.03        | <b>1.00</b> | <b>0.31</b> | 2.00        | 4.50        | <b>0.50</b> | 3.33        |
|                                     | <i>Thymus vulgaris</i>            | <b>1.00</b> | <b>0.38</b> | <b>0.50</b> | <b>0.38</b> | <b>0.75</b> | 0.75        | 2.00        | 2.67        | 1.50        | <b>0.28</b> | 2.00        | 2.13        | <b>1.00</b> | <b>0.50</b> | 2.00        | 1.50        | <b>0.50</b> | 3.33        |
| Piper nigrum<br>(black pepper)      | <i>Citrus aurantifolia</i>        | 2.00        | <b>0.38</b> | 2.00        | 1.00        | 2.00        | 0.83        | 8.00        | 3.33        | 2.00        | <b>0.50</b> | 3.00        | 0.94        | 2.00        | 1.00        | 3.00        | 1.50        | 4.00        | 10.67       |
|                                     | <i>Citrus bergamia</i>            | 8.00        | 1.00        | <b>1.00</b> | <b>0.50</b> | 2.00        | 0.83        | 4.00        | 1.33        | <b>1.00</b> | <b>0.25</b> | 8.00        | 3.33        | 2.00        | 0.83        | 2.00        | 0.63        | <b>0.25</b> | 0.63        |
|                                     | <i>Citrus limon</i>               | 8.00        | 1.00        | 2.00        | 1.00        | 2.00        | 0.83        | 6.00        | 2.50        | <b>1.00</b> | <b>0.25</b> | 3.00        | 0.94        | 3.00        | 1.25        | 4.00        | 3.00        | <b>0.19</b> | <b>0.44</b> |
|                                     | <i>Citrus sinensis</i>            | 2.00        | <b>0.25</b> | 2.00        | 1.00        | 2.00        | 0.83        | <b>0.38</b> | <b>0.25</b> | 2.00        | <b>0.50</b> | 8.00        | 2.50        | 3.00        | 1.50        | 3.00        | 1.25        | 1.50        | 3.75        |
|                                     | <i>Cupressus sempervirens</i>     | 4.00        | 0.92        | 2.00        | 1.00        | 2.00        | <b>0.46</b> | 8.00        | 2.67        | <b>1.00</b> | <b>0.25</b> | 1.50        | 0.63        | 2.00        | 1.00        | 3.00        | 0.94        | <b>0.25</b> | 0.75        |
|                                     | <i>Juniperus virginiana</i>       | 3.00        | 3.19        | <b>0.50</b> | <b>0.38</b> | <b>1.00</b> | <b>0.42</b> | <b>0.19</b> | 0.53        | <b>1.00</b> | <b>0.38</b> | <b>1.00</b> | 1.25        | <b>1.00</b> | <b>0.50</b> | 2.00        | 1.50        | <b>1.00</b> | 3.00        |
|                                     | <i>Lavandula angustifolia</i>     | 2.00        | 1.13        | 2.00        | 1.00        | 2.00        | 1.33        | 8.00        | 2.33        | <b>1.00</b> | <b>0.38</b> | 3.00        | 1.25        | <b>1.00</b> | 0.58        | 3.00        | 1.50        | <b>0.25</b> | 0.63        |

|                                                   |                                   |      |      |      |      |      |      |      |      |      |      |      |       |      |      |      |      |      |      |
|---------------------------------------------------|-----------------------------------|------|------|------|------|------|------|------|------|------|------|------|-------|------|------|------|------|------|------|
|                                                   | <i>Origanum vulgare</i>           | 8.00 | 1.00 | 1.00 | 0.50 | 2.00 | 0.83 | 2.00 | 1.33 | 2.00 | 0.58 | 8.00 | 3.33  | 2.00 | 1.00 | 2.00 | 1.00 | 2.00 | 4.50 |
|                                                   | <i>Rosmarinus officinalis</i>     | 4.00 | 0.75 | 2.00 | 1.00 | 2.00 | 0.83 | 2.00 | 1.33 | 2.00 | 0.50 | 8.00 | 2.50  | 2.00 | 1.00 | 0.75 | 0.38 | 0.13 | 0.50 |
|                                                   | <i>Santalum austrocaledonicum</i> | 0.50 | 0.36 | 0.25 | 0.56 | 0.13 | 0.05 | 0.25 | 2.04 | 0.38 | 0.30 | 0.38 | 1.59  | 2.00 | 0.63 | 2.00 | 4.50 | 0.25 | 1.17 |
|                                                   | <i>Styrax benzoin</i>             | 4.00 | 0.75 | 2.00 | 1.00 | 2.00 | 0.58 | 0.38 | 0.19 | 2.00 | 0.50 | 6.00 | 3.00  | 1.00 | 0.50 | 4.00 | 2.00 | 0.50 | 1.67 |
|                                                   | <i>Thymus vulgaris</i>            | 2.00 | 0.38 | 0.50 | 0.38 | 1.00 | 0.67 | 1.00 | 1.17 | 4.00 | 1.00 | 1.00 | 1.25  | 1.00 | 0.50 | 3.00 | 2.25 | 1.00 | 4.67 |
| <i>Rosa damascena</i><br>(rose)                   | <i>Santalum austrocaledonicum</i> | 0.25 | 0.23 | 0.25 | 0.56 | 1.00 | 0.50 | 0.06 | 0.75 | 0.25 | 0.23 | 0.75 | 3.38  | 3.00 | 0.94 | 1.00 | 2.25 | 0.13 | 0.46 |
| <i>Rosmarinus officinalis</i><br>(rosemary)       | <i>Melaleuca alternifolia</i>     | 2.00 | 0.50 | 0.75 | 0.44 | 1.00 | 0.50 | 3.00 | 2.50 | 8.00 | 2.00 | 1.50 | 0.59  | 3.00 | 1.13 | 1.00 | 0.50 | 0.09 | 0.25 |
| <i>Salvia officinalis</i><br>(sage)               | <i>Melaleuca alternifolia</i>     | 3.00 | 1.38 | 1.00 | 0.58 | 1.00 | 0.50 | 4.00 | 3.33 | 1.00 | 0.25 | 3.00 | 1.50  | 1.00 | 0.63 | 1.00 | 0.50 | 0.50 | 2.33 |
|                                                   | <i>Santalum austrocaledonicum</i> | 0.38 | 0.38 | 0.13 | 0.28 | 1.00 | 0.50 | 0.13 | 1.06 | 0.50 | 0.40 | 4.00 | 16.67 | 1.00 | 0.56 | 1.00 | 2.25 | 0.50 | 3.33 |
|                                                   | <i>Thymus vulgaris</i>            | 2.00 | 0.92 | 1.00 | 0.75 | 1.00 | 0.75 | 1.00 | 1.50 | 1.00 | 0.25 | 2.00 | 2.33  | 1.00 | 0.75 | 1.00 | 0.75 | 0.75 | 5.00 |
| <i>Salvia sclarea</i><br>(clary sage)             | <i>Boswellia carterii</i>         | 4.00 | 0.50 | 1.00 | 0.50 | 4.00 | 2.25 | 8.00 | 3.33 | 1.50 | 0.44 | 2.00 | 2.33  | 8.00 | 2.50 | 2.00 | 0.63 | 0.19 | 0.84 |
|                                                   | <i>Citrus aurantifolia</i>        | 4.00 | 0.75 | 2.00 | 1.00 | 2.00 | 0.63 | 2.00 | 0.83 | 1.50 | 0.38 | 1.50 | 0.34  | 8.00 | 2.50 | 2.00 | 0.63 | 0.19 | 0.88 |
|                                                   | <i>Citrus bergamia</i>            | 8.00 | 1.00 | 1.00 | 0.50 | 4.00 | 1.25 | 8.00 | 2.67 | 1.50 | 0.38 | 1.50 | 0.50  | 8.00 | 1.83 | 2.00 | 0.25 | 0.13 | 0.56 |
|                                                   | <i>Juniperus virginiana</i>       | 2.00 | 2.13 | 1.00 | 0.75 | 2.00 | 0.63 | 3.00 | 8.50 | 1.00 | 0.38 | 0.50 | 0.58  | 8.00 | 2.50 | 2.00 | 1.13 | 0.13 | 0.63 |
|                                                   | <i>Lavandula angustifolia</i>     | 1.00 | 0.56 | 1.00 | 0.50 | 2.00 | 1.13 | 8.00 | 2.33 | 2.00 | 0.75 | 1.50 | 0.50  | 2.00 | 0.79 | 2.00 | 0.63 | 0.50 | 2.25 |
|                                                   | <i>Lavandula burnati</i>          | 1.00 | 0.40 | 2.00 | 1.00 | 2.00 | 1.13 | 2.00 | 1.33 | 2.00 | 0.75 | 2.00 | 0.83  | 2.00 | 1.13 | 2.00 | 0.63 | 0.19 | 0.81 |
|                                                   | <i>Rosa damascena</i>             | 1.00 | 0.31 | 1.00 | 0.50 | 2.00 | 0.63 | 1.00 | 4.17 | 1.00 | 0.38 | 1.50 | 1.00  | 4.00 | 1.25 | 2.00 | 0.63 | 0.13 | 0.63 |
|                                                   | <i>Tagetes minuta</i>             | 1.00 | 0.56 | 2.00 | 1.00 | 2.00 | 0.38 | 2.00 | 2.33 | 1.00 | 0.38 | 2.00 | 0.67  | 2.00 | 1.13 | 2.00 | 0.63 | 0.50 | 2.25 |
| <i>Santalum austrocaledonicum</i><br>(sandalwood) | <i>Melaleuca alternifolia</i>     | 1.00 | 0.79 | 0.25 | 0.58 | 0.50 | 0.25 | 0.50 | 4.17 | 0.38 | 0.30 | 1.50 | 6.50  | 1.00 | 0.19 | 1.00 | 2.25 | 0.25 | 0.83 |
| <i>Styrax benzoin</i><br>(benzoin)                | <i>Boswellia carterii</i>         | 4.00 | 0.75 | 2.00 | 1.00 | 2.00 | 1.25 | 8.00 | 4.67 | 2.00 | 0.58 | 2.00 | 2.50  | 2.00 | 1.00 | 2.00 | 1.00 | 0.75 | 1.38 |
|                                                   | <i>Citrus bergamia</i>            | 8.00 | 1.50 | 2.00 | 1.00 | 8.00 | 3.00 | 8.00 | 4.00 | 1.50 | 0.38 | 1.50 | 0.63  | 8.00 | 3.33 | 2.00 | 0.63 | 0.75 | 1.38 |
|                                                   | <i>Citrus limon</i>               | 4.00 | 0.75 | 2.00 | 1.00 | 8.00 | 3.00 | 1.00 | 0.58 | 1.50 | 0.38 | 8.00 | 2.50  | 2.00 | 0.83 | 2.00 | 1.50 | 1.00 | 1.67 |
|                                                   | <i>Citrus sinensis</i>            | 8.00 | 1.50 | 3.00 | 1.50 | 4.00 | 1.50 | 3.00 | 2.50 | 2.00 | 0.50 | 8.00 | 2.50  | 2.00 | 1.00 | 4.00 | 1.67 | 0.75 | 1.38 |

|                                          |                                   |             |             |             |             |             |             |             |             |             |             |             |             |             |             |             |             |             |             |
|------------------------------------------|-----------------------------------|-------------|-------------|-------------|-------------|-------------|-------------|-------------|-------------|-------------|-------------|-------------|-------------|-------------|-------------|-------------|-------------|-------------|-------------|
| <i>Syzygium caryophyllata</i><br>(clove) | <i>Commiphora molmol</i>          | 4.00        | 1.00        | 2.00        | 1.00        | 2.00        | 1.25        | <b>0.13</b> | <b>0.38</b> | <b>1.00</b> | 0.63        | 3.00        | 6.75        | 8.00        | 2.50        | 2.00        | 1.00        | <b>0.50</b> | 1.17        |
|                                          | <i>Coriandrum sativum</i>         | <b>0.25</b> | <b>0.28</b> | 8.00        | 6.00        | <b>1.00</b> | 0.63        | <b>0.75</b> | 1.75        | <b>1.00</b> | <b>0.38</b> | <b>1.00</b> | 1.58        | 1.50        | 1.88        | 2.00        | 1.17        | <b>0.06</b> | 1.08        |
|                                          | <i>Cupressus sempervirens</i>     | 6.00        | 1.75        | 2.00        | 1.00        | 2.00        | <b>0.38</b> | 4.00        | 2.00        | 1.50        | <b>0.38</b> | 3.00        | 1.25        | 2.00        | 1.00        | 2.00        | 0.63        | <b>0.75</b> | 1.75        |
|                                          | <i>Lavandula angustifolia</i>     | <b>1.00</b> | 0.63        | 2.00        | 1.00        | 4.00        | 2.50        | <b>1.00</b> | <b>0.46</b> | 2.00        | 0.75        | 8.00        | 3.33        | <b>1.00</b> | 0.58        | 4.00        | 2.00        | <b>0.13</b> | <b>0.23</b> |
|                                          | <i>Mentha piperita</i>            | <b>1.00</b> | 0.63        | 2.00        | 1.00        | 2.00        | <b>0.50</b> | <b>1.00</b> | 0.67        | <b>1.00</b> | <b>0.25</b> | 2.00        | 1.00        | <b>1.00</b> | 0.75        | 4.00        | 2.00        | <b>0.13</b> | <b>0.21</b> |
|                                          | <i>Rosa damascena</i>             | 2.00        | 0.75        | <b>1.00</b> | <b>0.50</b> | <b>1.00</b> | <b>0.38</b> | <b>0.50</b> | 2.17        | 1.50        | 0.56        | <b>0.50</b> | <b>0.38</b> | 2.00        | 1.00        | <b>1.00</b> | <b>0.50</b> | <b>0.50</b> | 1.17        |
|                                          | <i>Santalum austrocaledonicum</i> | <b>1.00</b> | 0.79        | <b>0.13</b> | <b>0.28</b> | <b>0.50</b> | <b>0.19</b> | <b>0.63</b> | 5.21        | <b>0.38</b> | <b>0.30</b> | <b>0.38</b> | 1.59        | 8.00        | 2.50        | <b>0.75</b> | 1.69        | 8.00        | 32.00       |
|                                          | <i>Cinnamomum zeylanicum</i>      | <b>0.25</b> | <b>0.19</b> | <b>0.50</b> | 0.75        | <b>1.00</b> | 0.75        | <b>0.75</b> | 1.69        | <b>0.50</b> | <b>0.25</b> | <b>0.75</b> | 2.00        | <b>0.50</b> | <b>0.38</b> | 2.00        | 3.00        | <b>0.13</b> | 1.08        |
|                                          | <i>Citrus bergamia</i>            | <b>1.00</b> | <b>0.31</b> | <b>1.00</b> | 0.75        | 2.00        | 1.50        | 1.50        | 0.63        | <b>1.00</b> | <b>0.38</b> | 2.00        | 4.33        | <b>1.00</b> | <b>0.42</b> | 2.00        | 1.13        | <b>0.13</b> | 1.06        |
|                                          | <i>Citrus limon</i>               | <b>1.00</b> | <b>0.31</b> | <b>1.00</b> | 0.75        | 2.00        | 1.50        | 3.00        | 1.50        | <b>1.00</b> | <b>0.38</b> | <b>1.00</b> | 2.06        | 3.00        | 1.25        | 2.00        | 2.00        | <b>0.13</b> | 1.04        |
|                                          | <i>Citrus sinensis</i>            | <b>1.00</b> | <b>0.31</b> | 2.00        | 1.50        | 2.00        | 1.50        | 8.00        | 6.00        | <b>1.00</b> | <b>0.38</b> | <b>1.00</b> | 2.06        | 2.00        | 1.00        | 2.00        | 1.33        | <b>0.50</b> | 4.25        |
|                                          | <i>Commiphora molmol</i>          | <b>0.50</b> | <b>0.19</b> | <b>1.00</b> | 0.75        | 2.00        | 2.00        | 8.00        | 23.33       | <b>0.50</b> | <b>0.38</b> | <b>0.75</b> | 3.00        | 2.00        | 0.63        | 2.00        | 1.50        | <b>0.06</b> | 0.56        |
|                                          | <i>Cymbopogon citratus</i>        | <b>1.00</b> | 0.75        | <b>0.50</b> | <b>0.38</b> | <b>1.00</b> | 1.00        | 1.50        | 2.38        | <b>0.75</b> | <b>0.38</b> | <b>0.50</b> | 1.17        | <b>0.50</b> | <b>0.16</b> | 2.00        | 1.50        | <b>0.25</b> | 2.02        |
|                                          | <i>Eucalyptus globulus</i>        | <b>1.00</b> | <b>0.38</b> | <b>1.00</b> | 0.75        | 2.00        | 1.67        | 2.00        | 1.00        | <b>1.00</b> | <b>0.38</b> | <b>0.75</b> | 1.63        | <b>0.50</b> | <b>0.25</b> | 2.00        | 1.50        | <b>0.50</b> | 4.25        |
|                                          | <i>Juniperus virginiana</i>       | <b>0.50</b> | 0.63        | <b>0.50</b> | <b>0.50</b> | <b>1.00</b> | 0.75        | <b>0.19</b> | 0.55        | <b>1.00</b> | <b>0.50</b> | <b>0.38</b> | 1.13        | <b>1.00</b> | <b>0.50</b> | 2.00        | 2.00        | <b>0.13</b> | 1.13        |
|                                          | <i>Lavandula angustifolia</i>     | <b>1.00</b> | 0.75        | <b>1.00</b> | 0.75        | 2.00        | 2.00        | 1.50        | 0.56        | <b>1.00</b> | <b>0.50</b> | <b>0.75</b> | 1.63        | <b>1.00</b> | 0.58        | 2.00        | 1.50        | <b>0.13</b> | 1.06        |
|                                          | <i>Melaleuca alternifolia</i>     | <b>1.00</b> | <b>0.38</b> | <b>1.00</b> | 0.83        | <b>1.00</b> | 0.75        | <b>0.50</b> | <b>0.29</b> | <b>1.00</b> | <b>0.38</b> | <b>0.50</b> | 1.17        | <b>1.00</b> | <b>0.38</b> | 2.00        | 1.50        | <b>0.06</b> | 0.54        |
|                                          | <i>Mentha piperita</i>            | <b>1.00</b> | 0.75        | <b>1.00</b> | 0.75        | <b>1.00</b> | 0.63        | 6.00        | 3.50        | <b>1.00</b> | <b>0.38</b> | <b>1.00</b> | 2.25        | <b>1.00</b> | 0.75        | 2.00        | 1.50        | <b>0.25</b> | 2.08        |
|                                          | <i>Ocimum basilicum</i>           | <b>0.50</b> | 0.63        | <b>1.00</b> | 1.00        | 2.00        | 1.50        | <b>1.00</b> | 0.58        | <b>1.00</b> | <b>0.38</b> | 1.50        | 3.13        | <b>0.50</b> | <b>0.38</b> | 2.00        | 2.00        | <b>0.13</b> | 1.25        |
|                                          | <i>Pinus sylvestris</i>           | <b>1.00</b> | <b>0.50</b> | <b>1.00</b> | 0.75        | 2.00        | 2.00        | 8.00        | 4.67        | <b>1.00</b> | <b>0.31</b> | <b>1.00</b> | 2.06        | 2.00        | 1.00        | 2.00        | 1.50        | <b>0.06</b> | 0.75        |
|                                          | <i>Piper nigrum</i>               | <b>1.00</b> | <b>0.31</b> | <b>1.00</b> | 0.75        | 2.00        | 1.33        | 1.50        | 0.63        | <b>1.00</b> | <b>0.38</b> | <b>1.00</b> | 2.25        | 4.00        | 2.00        | 2.00        | 1.50        | <b>0.13</b> | 1.25        |
|                                          | <i>Rosmarinus officinalis</i>     | <b>1.00</b> | <b>0.38</b> | <b>1.00</b> | 0.75        | 2.00        | 1.50        | 4.00        | 3.00        | <b>1.00</b> | <b>0.38</b> | <b>1.00</b> | 2.06        | 2.00        | 1.00        | 2.00        | 1.50        | <b>0.09</b> | 0.94        |
|                                          | <i>Styrax benzoin</i>             | <b>1.00</b> | <b>0.38</b> | <b>0.50</b> | <b>0.38</b> | 2.00        | 1.25        | <b>0.75</b> | <b>0.44</b> | 4.00        | 1.50        | 1.50        | 3.38        | 4.00        | 2.00        | 2.00        | 1.50        | 8.00        | 74.67       |
|                                          | <i>Thymus vulgaris</i>            | <b>1.00</b> | <b>0.38</b> | <b>0.50</b> | <b>0.50</b> | <b>0.50</b> | <b>0.50</b> | <b>1.00</b> | 1.25        | 4.00        | 1.50        | <b>0.50</b> | 1.50        | <b>0.50</b> | <b>0.25</b> | 2.00        | 2.00        | <b>0.13</b> | 1.33        |

|                                        |                                   |                         |             |                         |             |                         |             |                         |             |                         |             |                         |             |                         |             |                         |             |                         |             |
|----------------------------------------|-----------------------------------|-------------------------|-------------|-------------------------|-------------|-------------------------|-------------|-------------------------|-------------|-------------------------|-------------|-------------------------|-------------|-------------------------|-------------|-------------------------|-------------|-------------------------|-------------|
|                                        | <i>Zingiber officinale</i>        | <b>1.00</b>             | <i>0.75</i> | <b>0.50</b>             | <b>0.50</b> | <b>1.00</b>             | <i>0.75</i> | 1.50                    | 1.13        | <b>0.50</b>             | <i>0.25</i> | <b>0.50</b>             | 1.08        | <b>1.00</b>             | <b>0.38</b> | 2.00                    | 2.00        | <b>0.25</b>             | 2.25        |
| <i>Thymus vulgaris</i><br>(thyme)      | <i>Melaleuca alternifolia</i>     | 2.00                    | <b>0.50</b> | <b>0.50</b>             | <b>0.42</b> | <b>1.00</b>             | <i>0.75</i> | 2.00                    | 2.67        | 2.00                    | <b>0.50</b> | 1.50                    | 2.00        | <b>1.00</b>             | <b>0.38</b> | 2.00                    | 1.50        | <b>0.09</b>             | <b>0.31</b> |
| <i>Zingiber officinale</i><br>(ginger) | <i>Citrus limon</i>               | 6.00                    | 3.38        | 2.00                    | 1.50        | 4.00                    | 2.00        | <b>0.50</b>             | <b>0.50</b> | 2.00                    | <i>0.75</i> | 4.00                    | 0.92        | <b>1.00</b>             | <b>0.38</b> | 4.00                    | 2.67        | <b>0.75</b>             | 1.13        |
|                                        | <i>Citrus sinensis</i>            | 2.00                    | 1.25        | <b>1.00</b>             | <i>0.75</i> | 4.00                    | 3.00        | <b>0.13</b>             | <b>0.40</b> | <b>1.00</b>             | <i>0.75</i> | 2.00                    | 4.33        | <b>1.00</b>             | <b>0.19</b> | 4.00                    | 3.00        | <b>0.38</b>             | <i>0.75</i> |
|                                        | <i>Commiphora molmol</i>          | <b>1.00</b>             | <i>1.00</i> | <b>1.00</b>             | <i>0.75</i> | 2.00                    | 1.50        | <b>0.19</b>             | <b>0.34</b> | 4.00                    | 2.00        | 3.00                    | 1.50        | <b>0.50</b>             | <b>0.09</b> | 4.00                    | 3.00        | <b>0.25</b>             | <b>0.27</b> |
|                                        | <i>Cymbopogon citratus</i>        | 2.00                    | 1.25        | <b>1.00</b>             | <i>0.83</i> | 1.50                    | <i>0.75</i> | <b>1.00</b>             | <i>0.83</i> | <b>1.00</b>             | <b>0.38</b> | 4.00                    | 2.00        | <b>0.75</b>             | <b>0.19</b> | 4.00                    | 3.00        | <b>0.50</b>             | <i>0.83</i> |
|                                        | <i>Melaleuca alternifolia</i>     | 2.00                    | 2.00        | 2.00                    | 1.50        | 2.00                    | <i>0.75</i> | <b>0.50</b>             | <b>0.42</b> | <b>1.00</b>             | <b>0.38</b> | 4.00                    | 1.67        | <b>0.75</b>             | <b>0.47</b> | 4.00                    | 3.00        | <b>0.38</b>             | <b>0.50</b> |
|                                        | <i>Mentha piperita</i>            | 1.50                    | 2.25        | <b>1.00</b>             | <i>0.75</i> | 2.00                    | 1.50        | <b>0.13</b>             | <b>0.19</b> | <b>1.00</b>             | <b>0.50</b> | 4.00                    | 2.00        | <b>1.00</b>             | 1.13        | 4.00                    | 4.00        | <b>0.38</b>             | 1.13        |
|                                        | <i>Pimenta racemosa</i>           | 2.00                    | 1.25        | 2.00                    | 1.50        | 2.00                    | <i>1.00</i> | <b>0.38</b>             | <b>0.38</b> | <b>1.00</b>             | <b>0.38</b> | 8.00                    | 1.83        | 2.00                    | <i>0.75</i> | 4.00                    | 3.00        | <b>0.50</b>             | 1.50        |
|                                        | <i>Rosmarinus officinalis</i>     | 2.00                    | 1.67        | 2.00                    | 1.50        | 2.00                    | <i>1.00</i> | <b>0.19</b>             | <b>0.19</b> | <b>0.75</b>             | <b>0.28</b> | 4.00                    | 1.33        | <b>0.50</b>             | <b>0.31</b> | 4.00                    | 3.00        | <b>0.50</b>             | 2.50        |
|                                        | <i>Salvia officinalis</i>         | <b>0.50</b>             | <i>0.58</i> | <b>0.13</b>             | <b>0.31</b> | <b>0.25</b>             | <b>0.13</b> | <b>0.62</b>             | 5.30        | 2.00                    | 1.83        | <b>0.13</b>             | <i>0.52</i> | <b>0.75</b>             | <b>0.14</b> | 4.00                    | 10.00       | <b>0.25</b>             | <i>0.92</i> |
|                                        | <i>Santalum austrocaledonicum</i> | <b>1.00</b>             | <i>0.63</i> | <b>1.00</b>             | <i>1.00</i> | 1.50                    | 1.13        | <b>1.00</b>             | 1.50        | <b>1.00</b>             | <b>0.38</b> | 2.00                    | 2.33        | <b>0.50</b>             | <b>0.19</b> | 4.00                    | 4.00        | <b>0.50</b>             | 1.83        |
|                                        | <i>Thymus vulgaris</i>            | 2.00                    | <i>0.63</i> | 2.00                    | <i>1.00</i> | 4.00                    | 4.00        | 3.00                    | 1.25        | 2.00                    | <i>0.83</i> | 4.00                    | 5.33        | <b>0.75</b>             | <i>0.56</i> | 2.00                    | <i>1.00</i> | <b>0.25</b>             | <b>0.16</b> |
| Standard error mean                    |                                   | 0.08                    |             | 0.08                    |             | 0.08                    |             | 0.13                    |             | 0.06                    |             | 0.13                    |             | 0.11                    |             | 0.06                    |             | 0.05                    |             |
| Positive control (ciprofloxacin)       |                                   | 0.50 x 10 <sup>-3</sup> |             | 0.50 x 10 <sup>-3</sup> |             | 0.50 x 10 <sup>-3</sup> |             | 0.50 x 10 <sup>-3</sup> |             | 0.50 x 10 <sup>-3</sup> |             | 0.25 x 10 <sup>-3</sup> |             | 1.00 x 10 <sup>-3</sup> |             | 0.50 x 10 <sup>-3</sup> |             | n.a.                    |             |
| Positive control (amphotericin b)      |                                   | n.a.                    |             | n.a.                    |             | n.a.                    |             | n.a.                    |             | n.a.                    |             | n.a.                    |             | n.a.                    |             | n.a.                    |             | 0.50 x 10 <sup>-3</sup> |             |
| Negative control (acetone in water)    |                                   | > 8.00                  |             | > 8.00                  |             | > 8.00                  |             | > 8.00                  |             | > 8.00                  |             | > 8.00                  |             | > 8.00                  |             | > 8.00                  |             | > 8.00                  |             |

**MIC\*** denotes noteworthy antimicrobial effect (MIC less than or equal to 1 mg/mL); **ΣFIC\*\*** in bold and italics denotes synergistic antimicrobial effect (ΣFIC less than or equal to 0.50); while ΣFIC in italics only denotes additive antimicrobial effect (ΣFIC greater than 0.50 and less than or equal to 1.00).



**Table S2.** The mean percentage brine-shrimp viability after 48 hours (n = 3) and  $\Sigma$ FIC values of the essential oil combinations investigated

| Essential oil combinations               |                                   | Individual brine-shrimp mortality (%)* |                 | Combined brine-shrimp mortality (%)* | $\Sigma$ FIC** |
|------------------------------------------|-----------------------------------|----------------------------------------|-----------------|--------------------------------------|----------------|
| Essential oil 1                          | Essential oil 2                   | Essential oil 1                        | Essential oil 2 |                                      |                |
| <i>Abies balsamea</i> (fir)              | <i>Boswellia carterii</i>         | <b>0.69</b>                            | <b>1.39</b>     | 81.94                                | 88.92          |
|                                          | <i>Carum carvi</i>                |                                        | 96.32           | 90.61                                | 66.23          |
|                                          | <i>Juniperus virginiana</i>       |                                        | <b>0.57</b>     | 77.71                                | 124.01         |
|                                          | <i>Lavandula angustifolia</i>     |                                        | <b>9.59</b>     | 59.61                                | 46.37          |
|                                          | <i>Melaleuca viridiflora</i>      |                                        | <b>4.14</b>     | 78.16                                | 66.16          |
|                                          | <i>Myrtus communis</i>            |                                        | <b>0.00</b>     | 78.02                                | 3957.84        |
|                                          | <i>Ocimum basilicum</i>           |                                        | <b>13.04</b>    | 91.81                                | 70.15          |
| <i>Amyris balsamifera</i> (amyris)       | <i>Boswellia carterii</i>         | <b>1.40</b>                            | <b>1.39</b>     | <b>6.14</b>                          | 4.40           |
|                                          | <i>Canarium luzonicum</i>         |                                        | <b>0.73</b>     | 98.55                                | 102.90         |
|                                          | <i>Ferula galbaniflua</i>         |                                        | <b>15.77</b>    | 75.82                                | 29.52          |
|                                          | <i>Lavandula angustifolia</i>     |                                        | <b>9.59</b>     | <b>13.31</b>                         | 5.46           |
|                                          | <i>Salvia officinalis</i>         |                                        | <b>0.82</b>     | <b>45.43</b>                         | 44.05          |
|                                          | <i>Styrax benzoin</i>             |                                        | <b>2.47</b>     | <b>5.65</b>                          | 3.16           |
| <i>Boswellia carterii</i> (frankincense) | <i>Cinnamomum zeylanicum</i>      | <b>1.39</b>                            | 98.49           | <b>11.38</b>                         | 4.15           |
|                                          | <i>Citrus bergamia</i>            |                                        | <b>1.22</b>     | 81.61                                | 62.81          |
|                                          | <i>Citrus limon</i>               |                                        | <b>1.75</b>     | <b>2.38</b>                          | 1.54           |
|                                          | <i>Citrus sinensis</i>            |                                        | <b>0.96</b>     | <b>8.95</b>                          | 7.90           |
|                                          | <i>Commiphora molmol</i>          |                                        | <b>1.03</b>     | <b>6.77</b>                          | 5.73           |
|                                          | <i>Elettaria cardamomum</i>       |                                        | <b>0.00</b>     | <b>25.69</b>                         | 1293.67        |
|                                          | <i>Ferula galbaniflua</i>         |                                        | <b>15.77</b>    | <b>17.50</b>                         | 6.84           |
|                                          | <i>Helichrysum italicum</i>       |                                        | <b>9.50</b>     | <b>41.38</b>                         | 17.05          |
|                                          | <i>Juniperus virginiana</i>       |                                        | <b>0.57</b>     | 65.06                                | 79.99          |
|                                          | <i>Lavandula angustifolia</i>     |                                        | <b>9.59</b>     | <b>3.30</b>                          | 1.36           |
|                                          | <i>Melaleuca viridiflora</i>      |                                        | <b>4.14</b>     | 62.54                                | 30.03          |
|                                          | <i>Ocimum basilicum</i>           |                                        | <b>13.04</b>    | 83.62                                | 33.25          |
|                                          | <i>Origanum vulgare</i>           |                                        | 99.67           | <b>1.39</b>                          | <b>0.51</b>    |
|                                          | <i>Pimenta racemosa</i>           |                                        | 100.00          | 91.41                                | 33.31          |
|                                          | <i>Pinus sylvestris</i>           |                                        | <b>1.04</b>     | <b>2.37</b>                          | 1.99           |
|                                          | <i>Piper nigrum</i>               |                                        | <b>1.32</b>     | 88.62                                | 65.42          |
|                                          | <i>Rosmarinus officinalis</i>     |                                        | <b>0.71</b>     | <b>2.75</b>                          | 2.93           |
|                                          | <i>Salvia officinalis</i>         |                                        | <b>0.82</b>     | <b>3.75</b>                          | 3.64           |
|                                          | <i>Santalum austrocaledonicum</i> |                                        | 99.22           | <b>10.07</b>                         | 3.65           |
|                                          | <i>Zingiber officinale</i>        |                                        | <b>0.19</b>     | 78.57                                | 233.30         |
| <i>Canarium luzonicum</i> (elemi)        | <i>Boswellia carterii</i>         | <b>0.73</b>                            | <b>1.39</b>     | 88.42                                | 92.47          |
|                                          | <i>Citrus sinensis</i>            |                                        | <b>0.96</b>     | <b>4.03</b>                          | 4.88           |
|                                          | <i>Elettaria cardamomum</i>       |                                        | <b>0.00</b>     | 74.32                                | 3767.22        |
|                                          | <i>Lavandula angustifolia</i>     |                                        | <b>9.59</b>     | <b>7.85</b>                          | 5.80           |

| Essential oil combinations          |                               | Individual brine-shrimp mortality (%)* |                 | Combined brine-shrimp mortality (%)* | ΣFIC**  |
|-------------------------------------|-------------------------------|----------------------------------------|-----------------|--------------------------------------|---------|
| Essential oil 1                     | Essential oil 2               | Essential oil 1                        | Essential oil 2 |                                      |         |
|                                     | <i>Rosmarinus officinalis</i> |                                        | 0.71            | 84.18                                | 117.35  |
|                                     | <i>Zingiber officinale</i>    |                                        | 0.19            | 3.32                                 | 10.95   |
| Carum carvi<br>(caraway)            | <i>Boswellia carterii</i>     | 96.32                                  | 1.39            | 93.68                                | 34.15   |
|                                     | <i>Canarium luzonicum</i>     |                                        | 0.73            | 96.40                                | 66.68   |
|                                     | <i>Citrus sinensis</i>        |                                        | 0.96            | 61.69                                | 32.62   |
|                                     | <i>Coriandrum sativum</i>     |                                        | 11.95           | 92.15                                | 4.33    |
|                                     | <i>Elettaria cardamomum</i>   |                                        | 0.00            | 84.81                                | 4241.13 |
|                                     | <i>Ferula galbaniflua</i>     |                                        | 15.77           | 95.00                                | 3.50    |
|                                     | <i>Laurus nobilis</i>         |                                        | 3.04            | 82.32                                | 13.98   |
|                                     | <i>Lavandula angustifolia</i> |                                        | 9.59            | 91.05                                | 5.22    |
|                                     | <i>Ocimum basilicum</i>       |                                        | 13.04           | 88.58                                | 3.86    |
|                                     | <i>Styrax benzoin</i>         |                                        | 2.47            | 69.30                                | 14.38   |
|                                     | <i>Zingiber officinale</i>    |                                        | 0.19            | 95.87                                | 250.71  |
| Cinnamomum camphora<br>(camphor)    | <i>Citrus limon</i>           |                                        | 1.75            | 80.23                                | 51.20   |
|                                     | <i>Lavandula angustifolia</i> |                                        | 9.59            | 81.82                                | 33.11   |
|                                     | <i>Melaleuca cajuputii</i>    |                                        | 0.60            | 70.64                                | 84.10   |
|                                     | <i>Myrtus communis</i>        |                                        | 0.00            | 85.26                                | 4292.87 |
|                                     | <i>Ocimum basilicum</i>       |                                        | 13.04           | 70.06                                | 27.36   |
|                                     | <i>Pinus sylvestris</i>       |                                        | 1.04            | 86.11                                | 71.81   |
|                                     | <i>Zingiber officinale</i>    |                                        | 0.19            | 66.21                                | 196.16  |
| Cinnamomum zeylanicum<br>(cinnamon) | <i>Citrus limon</i>           | 1.42                                   | 1.75            | 80.28                                | 23.34   |
|                                     | <i>Citrus sinensis</i>        |                                        | 0.96            | 83.31                                | 44.04   |
|                                     | <i>Commiphora molmol</i>      |                                        | 1.03            | 81.53                                | 40.08   |
|                                     | <i>Elettaria cardamomum</i>   |                                        | 0.00            | 67.24                                | 3362.11 |
|                                     | <i>Eucalyptus globulus</i>    |                                        | 4.21            | 82.24                                | 10.19   |
|                                     | <i>Ferula galbaniflua</i>     |                                        | 15.77           | 90.78                                | 3.34    |
|                                     | <i>Lavandula angustifolia</i> |                                        | 9.59            | 81.03                                | 4.64    |
|                                     | <i>Melaleuca alternifolia</i> |                                        | 1.07            | 84.98                                | 39.97   |
|                                     | <i>Ocimum basilicum</i>       |                                        | 13.04           | 83.60                                | 3.63    |
|                                     | <i>Pinus sylvestris</i>       |                                        | 1.04            | 86.19                                | 41.93   |
|                                     | <i>Rosmarinus officinalis</i> |                                        | 0.71            | 82.40                                | 58.72   |
|                                     | <i>Styrax benzoin</i>         |                                        | 2.47            | 76.69                                | 15.91   |
|                                     | <i>Thymus vulgaris</i>        |                                        | 97.76           | 88.63                                | 0.90    |
|                                     | <i>Zingiber officinale</i>    |                                        | 0.19            | 90.60                                | 236.94  |
| Citrus aurantifolia<br>(lime)       | <i>Rosa damascena</i>         | 0.36                                   | 97.32           | 5.71                                 | 7.90    |
|                                     | <i>Rosmarinus officinalis</i> |                                        | 0.71            | 0.00                                 | 0.00    |
|                                     | <i>Salvia officinalis</i>     |                                        | 0.82            | 2.09                                 | 4.16    |
| Citrus bergamia<br>(bergamot)       | <i>Citrus aurantifolia</i>    | 1.22                                   | 0.36            | 65.27                                | 116.85  |
|                                     | <i>Citrus limon</i>           |                                        | 1.75            | 71.51                                | 49.76   |

| Essential oil combinations     |                                   | Individual brine-shrimp mortality (%)* |                 | Combined brine-shrimp mortality (%)* | ΣFIC**  |
|--------------------------------|-----------------------------------|----------------------------------------|-----------------|--------------------------------------|---------|
| Essential oil 1                | Essential oil 2                   | Essential oil 1                        | Essential oil 2 |                                      |         |
|                                | <i>Commiphora molmol</i>          |                                        | 1.03            | 94.88                                | 85.09   |
|                                | <i>Coriandrum sativum</i>         |                                        | 11.95           | 83.19                                | 37.61   |
|                                | <i>Cupressus sempervirens</i>     |                                        | 1.02            | 0.65                                 | 0.59    |
|                                | <i>Eucalyptus globulus</i>        |                                        | 4.21            | 9.02                                 | 4.77    |
|                                | <i>Helichrysum italicum</i>       |                                        | 9.50            | 67.87                                | 31.41   |
|                                | <i>Lavandula angustifolia</i>     |                                        | 9.59            | 78.09                                | 36.11   |
|                                | <i>Lavandula burnati</i>          |                                        | 0.16            | 97.20                                | 351.89  |
|                                | <i>Lavandula spica</i>            |                                        | 1.01            | 80.68                                | 73.07   |
|                                | <i>Melaleuca alternifolia</i>     |                                        | 1.07            | 95.54                                | 83.64   |
|                                | <i>Myrtus communis</i>            |                                        | 0.00            | 92.06                                | 4640.95 |
|                                | <i>Origanum vulgare</i>           |                                        | 99.67           | 90.53                                | 37.59   |
|                                | <i>Pinus sylvestris</i>           |                                        | 1.04            | 67.39                                | 60.09   |
|                                | <i>Rosa damascena</i>             |                                        | 97.32           | 92.23                                | 38.31   |
|                                | <i>Rosmarinus officinalis</i>     |                                        | 0.71            | 98.44                                | 110.04  |
|                                | <i>Salvia officinalis</i>         |                                        | 0.82            | 74.63                                | 76.27   |
|                                | <i>Santalum austrocaledonicum</i> |                                        | 99.22           | 95.87                                | 39.81   |
|                                | <i>Thymus vulgaris</i>            |                                        | 97.76           | 88.66                                | 36.83   |
| Citrus limon (lemon)           | <i>Citrus sinensis</i>            | 1.75                                   | 0.96            | 6.74                                 | 5.46    |
|                                | <i>Commiphora molmol</i>          |                                        | 1.03            | 6.40                                 | 4.94    |
|                                | <i>Melaleuca viridiflora</i>      |                                        | 4.14            | 11.69                                | 4.75    |
|                                | <i>Mentha piperita</i>            |                                        | 6.98            | 4.29                                 | 1.53    |
|                                | <i>Pimenta racemosa</i>           |                                        | 100.00          | 2.95                                 | 0.86    |
|                                | <i>Rosa damascena</i>             |                                        | 97.32           | 66.14                                | 19.23   |
|                                | <i>Santalum austrocaledonicum</i> |                                        | 99.22           | 4.00                                 | 1.16    |
|                                | <i>Thymus vulgaris</i>            |                                        | 97.76           | 5.27                                 | 1.53    |
| Citrus sinensis (orange)       | <i>Melaleuca alternifolia</i>     | 0.96                                   | 1.07            | 37.66                                | 37.24   |
|                                | <i>Pimenta racemosa</i>           |                                        | 100.00          | 88.57                                | 46.81   |
|                                | <i>Rosa damascena</i>             |                                        | 97.32           | 87.30                                | 46.15   |
|                                | <i>Rosmarinus officinalis</i>     |                                        | 0.71            | 4.35                                 | 5.35    |
|                                | <i>Salvia officinalis</i>         |                                        | 0.82            | 42.21                                | 47.92   |
|                                | <i>Thymus vulgaris</i>            |                                        | 97.76           | 84.07                                | 44.44   |
| Commiphora molmol (myrrh)      | <i>Mentha piperita</i>            | 1.03                                   | 6.98            | 2.17                                 | 1.21    |
|                                | <i>Pinus sylvestris</i>           |                                        | 1.04            | 57.52                                | 55.67   |
|                                | <i>Santalum austrocaledonicum</i> |                                        | 99.22           | 59.32                                | 29.16   |
|                                | <i>Thymus vulgaris</i>            |                                        | 97.76           | 74.26                                | 36.51   |
| Coriandrum sativum (coriander) | <i>Boswellia carterii</i>         | 11.95                                  | 1.39            | 11.17                                | 4.48    |
|                                | <i>Citrus limon</i>               |                                        | 1.75            | 4.98                                 | 1.63    |
|                                | <i>Citrus sinensis</i>            |                                        | 0.96            | 15.78                                | 8.92    |
|                                | <i>Cupressus sempervirens</i>     |                                        | 1.02            | 71.60                                | 38.17   |

| Essential oil combinations                 |                                   | Individual brine-shrimp mortality (%)* |                 | Combined brine-shrimp mortality (%)* | ΣFIC**  |
|--------------------------------------------|-----------------------------------|----------------------------------------|-----------------|--------------------------------------|---------|
| Essential oil 1                            | Essential oil 2                   | Essential oil 1                        | Essential oil 2 |                                      |         |
|                                            | <i>Cymbopogon citratus</i>        |                                        | 100.00          | 66.36                                | 3.11    |
|                                            | <i>Ferula galbaniflua</i>         |                                        | 15.77           | 7.31                                 | 0.54    |
|                                            | <i>Melaleuca viridiflora</i>      |                                        | 4.14            | 5.63                                 | 0.91    |
|                                            | <i>Myrtus communis</i>            |                                        | 0.00            | 85.13                                | 4259.86 |
|                                            | <i>Pinus sylvestris</i>           |                                        | 1.04            | 7.25                                 | 3.79    |
|                                            | <i>Piper nigrum</i>               |                                        | 1.32            | 87.03                                | 36.61   |
|                                            | <i>Salvia officinalis</i>         |                                        | 0.82            | 3.90                                 | 2.55    |
|                                            | <i>Santalum austrocaledonicum</i> |                                        | 99.22           | 41.79                                | 1.96    |
|                                            | <i>Zingiber officinale</i>        |                                        | 0.19            | 6.98                                 | 18.52   |
| <i>Cupressus sempervirens</i><br>(cypress) | <i>Boswellia carterii</i>         | 1.02                                   | 1.39            | 56.73                                | 48.26   |
|                                            | <i>Citrus limon</i>               |                                        | 1.75            | 60.20                                | 46.77   |
|                                            | <i>Citrus sinensis</i>            |                                        | 0.96            | 79.97                                | 81.15   |
|                                            | <i>Commiphora molmol</i>          |                                        | 1.03            | 7.10                                 | 6.95    |
|                                            | <i>Hyssopus officinalis</i>       |                                        | 6.65            | 8.80                                 | 4.99    |
|                                            | <i>Juniperus virginiana</i>       |                                        | 0.57            | 10.36                                | 14.11   |
|                                            | <i>Lavandula angustifolia</i>     |                                        | 9.59            | 39.18                                | 21.29   |
|                                            | <i>Melaleuca alternifolia</i>     |                                        | 1.07            | 8.87                                 | 8.48    |
|                                            | <i>Mentha piperita</i>            |                                        | 6.98            | 72.09                                | 40.58   |
|                                            | <i>Origanum vulgare</i>           |                                        | 99.67           | 83.11                                | 41.24   |
|                                            | <i>Pinus sylvestris</i>           |                                        | 1.04            | 3.61                                 | 3.51    |
|                                            | <i>Rosmarinus officinalis</i>     |                                        | 0.71            | 93.02                                | 111.51  |
|                                            | <i>Salvia officinalis</i>         |                                        | 0.82            | 17.25                                | 19.03   |
|                                            | <i>Salvia sclarea</i>             |                                        | 0.20            | 11.81                                | 34.67   |
|                                            | <i>Santalum austrocaledonicum</i> |                                        | 99.22           | 86.66                                | 43.01   |
| <i>Cymbopogon citratus</i><br>(lemongrass) | <i>Citrus sinensis</i>            | 100.00                                 | 0.96            | 87.00                                | 45.98   |
|                                            | <i>Melaleuca alternifolia</i>     |                                        | 1.07            | 89.12                                | 41.91   |
|                                            | <i>Melaleuca viridiflora</i>      |                                        | 4.14            | 73.30                                | 9.21    |
|                                            | <i>Mentha piperita</i>            |                                        | 6.98            | 80.89                                | 6.20    |
|                                            | <i>Pimenta racemosa</i>           |                                        | 100.00          | 81.43                                | 0.81    |
|                                            | <i>Rosmarinus officinalis</i>     |                                        | 0.71            | 79.81                                | 56.87   |
|                                            | <i>Santalum austrocaledonicum</i> |                                        | 99.22           | 80.83                                | 0.81    |
|                                            | <i>Thymus vulgaris</i>            |                                        | 97.76           | 82.01                                | 0.83    |
| <i>Daucus carota</i><br>(carrot seed)      | <i>Citrus aurantifolia</i>        | 11.19                                  | 0.36            | 89.19                                | 127.07  |
|                                            | <i>Citrus bergamia</i>            |                                        | 1.22            | 90.49                                | 41.16   |
|                                            | <i>Citrus limon</i>               |                                        | 1.75            | 87.79                                | 29.00   |
|                                            | <i>Citrus sinensis</i>            |                                        | 0.96            | 86.48                                | 49.14   |
|                                            | <i>Lavandula angustifolia</i>     |                                        | 9.59            | 86.07                                | 8.34    |
|                                            | <i>Rosmarinus officinalis</i>     |                                        | 0.71            | 92.73                                | 69.76   |
|                                            | <i>Citrus limon</i>               | 0.00                                   | 1.75            | 91.49                                | 4600.85 |

| Essential oil combinations                  |                                   | Individual brine-shrimp mortality (%)* |                 | Combined brine-shrimp mortality (%)* | ΣFIC**      |
|---------------------------------------------|-----------------------------------|----------------------------------------|-----------------|--------------------------------------|-------------|
| Essential oil 1                             | Essential oil 2                   | Essential oil 1                        | Essential oil 2 |                                      |             |
| <i>Elettaria cardamomum</i><br>(cardamom)   | <i>Coriandrum sativum</i>         | <b>4.21</b>                            | <b>11.95</b>    | <b>35.07</b>                         | 1754.74     |
|                                             | <i>Myrtus communis</i>            |                                        | <b>0.00</b>     | 66.43                                | 6642.89     |
|                                             | <i>Pinus sylvestris</i>           |                                        | <b>1.04</b>     | 95.25                                | 4808.41     |
| <i>Eucalyptus globulus</i><br>(eucalyptus)  | <i>Citrus limon</i>               |                                        | <b>1.75</b>     | 68.65                                | 27.76       |
|                                             | <i>Commiphora molmol</i>          |                                        | <b>1.03</b>     | 80.22                                | 48.56       |
|                                             | <i>Coriandrum sativum</i>         |                                        | <b>11.95</b>    | <b>45.52</b>                         | 7.31        |
|                                             | <i>Cupressus sempervirens</i>     |                                        | <b>1.02</b>     | <b>34.17</b>                         | 20.85       |
|                                             | <i>Cymbopogon citratus</i>        |                                        | 100.00          | 86.66                                | 10.73       |
|                                             | <i>Juniperus virginiana</i>       |                                        | <b>0.57</b>     | 83.87                                | 82.95       |
|                                             | <i>Lavandula angustifolia</i>     |                                        | <b>9.59</b>     | <b>34.08</b>                         | 5.83        |
|                                             | <i>Melaleuca alternifolia</i>     |                                        | <b>1.07</b>     | 79.10                                | 46.20       |
|                                             | <i>Mentha piperita</i>            |                                        | <b>6.98</b>     | 78.32                                | 14.92       |
|                                             | <i>Origanum vulgare</i>           |                                        | 99.67           | 74.69                                | 9.25        |
|                                             | <i>Pinus sylvestris</i>           |                                        | <b>1.04</b>     | 83.41                                | 50.06       |
|                                             | <i>Rosmarinus officinalis</i>     |                                        | <b>0.71</b>     | 86.89                                | 71.81       |
|                                             | <i>Styrax benzoin</i>             |                                        | <b>2.47</b>     | <b>8.52</b>                          | 2.74        |
|                                             | <i>Thymus vulgaris</i>            |                                        | 97.76           | 78.27                                | 9.70        |
|                                             | <i>Zingiber officinale</i>        |                                        | <b>0.19</b>     | 55.97                                | 152.72      |
| <i>Ferula galbaniflua</i><br>(galbanum)     | <i>Canarium luzonicum</i>         |                                        | <b>0.73</b>     | <b>4.19</b>                          | 3.01        |
|                                             | <i>Commiphora molmol</i>          |                                        | <b>1.03</b>     | <b>3.86</b>                          | 2.00        |
|                                             | <i>Elettaria cardamomum</i>       |                                        | <b>0.00</b>     | <b>5.79</b>                          | 289.90      |
|                                             | <i>Melaleuca viridiflora</i>      |                                        | <b>4.14</b>     | <b>2.69</b>                          | <b>0.41</b> |
|                                             | <i>Pimenta racemosa</i>           |                                        | 100.00          | 92.18                                | 3.38        |
|                                             | <i>Pinus sylvestris</i>           |                                        | <b>1.04</b>     | <b>8.19</b>                          | 4.20        |
|                                             | <i>Rosa damascena</i>             |                                        | 97.32           | <b>4.07</b>                          | <b>0.15</b> |
|                                             | <i>Tagetes minuta</i>             |                                        | <b>1.30</b>     | <b>3.98</b>                          | 1.66        |
|                                             | <i>Zingiber officinale</i>        |                                        | <b>0.19</b>     | <b>28.08</b>                         | 74.18       |
| <i>Foeniculum vulgare</i><br>(fennel)       | <i>Citrus limon</i>               | 84.26                                  | <b>1.75</b>     | 81.46                                | 23.75       |
|                                             | <i>Hyssopus officinalis</i>       |                                        | <b>6.65</b>     | 72.32                                | 5.87        |
|                                             | <i>Lavandula angustifolia</i>     |                                        | <b>9.59</b>     | 80.29                                | 4.66        |
|                                             | <i>Melaleuca viridiflora</i>      |                                        | <b>4.14</b>     | 82.73                                | 10.48       |
|                                             | <i>Ocimum basilicum</i>           |                                        | <b>13.04</b>    | 82.97                                | 3.67        |
|                                             | <i>Origanum vulgare</i>           |                                        | 99.67           | 91.49                                | 1.00        |
|                                             | <i>Rosa damascena</i>             |                                        | 97.32           | 70.62                                | 0.78        |
|                                             | <i>Rosmarinus officinalis</i>     |                                        | <b>0.71</b>     | 84.54                                | 60.32       |
|                                             | <i>Santalum austrocaledonicum</i> |                                        | 99.22           | 83.87                                | 0.92        |
| <i>Helichrysum italicum</i><br>(immortelle) | <i>Citrus sinensis</i>            | <b>9.50</b>                            | <b>0.96</b>     | 77.35                                | 44.56       |
|                                             | <i>Lavandula angustifolia</i>     |                                        | <b>9.59</b>     | <b>13.45</b>                         | 1.41        |
|                                             | <i>Lavandula burnati</i>          |                                        | <b>0.16</b>     | 77.22                                | 251.94      |

| Essential oil combinations                 |                                   | Individual brine-shrimp mortality (%)* |                 | Combined brine-shrimp mortality (%)* | ΣFIC**      |
|--------------------------------------------|-----------------------------------|----------------------------------------|-----------------|--------------------------------------|-------------|
| Essential oil 1                            | Essential oil 2                   | Essential oil 1                        | Essential oil 2 |                                      |             |
|                                            | <i>Lavandula spica</i>            |                                        | <b>1.01</b>     | <b>26.38</b>                         | 14.46       |
|                                            | <i>Rosa damascena</i>             |                                        | 97.32           | <b>7.59</b>                          | <b>0.44</b> |
| <i>Hyssopus officinalis</i><br>(hyssop)    | <i>Citrus limon</i>               | <b>6.65</b>                            | <b>1.75</b>     | <b>8.59</b>                          | 3.10        |
|                                            | <i>Citrus sinensis</i>            |                                        | <b>0.96</b>     | <b>7.88</b>                          | 4.72        |
|                                            | <i>Lavandula angustifolia</i>     |                                        | <b>9.59</b>     | <b>4.87</b>                          | 0.62        |
|                                            | <i>Rosmarinus officinalis</i>     |                                        | <b>0.71</b>     | <b>13.07</b>                         | 10.23       |
|                                            | <i>Salvia officinalis</i>         |                                        | <b>0.82</b>     | <b>7.10</b>                          | 4.88        |
|                                            | <i>Santalum austrocaledonicum</i> |                                        | 99.22           | <b>32.10</b>                         | 2.58        |
| <i>Illicium verum</i><br>(star-anise)      | <i>Carum carvi</i>                |                                        | 96.32           | 76.86                                | 2.88        |
|                                            | <i>Coriandrum sativum</i>         |                                        | <b>11.95</b>    | 87.02                                | 6.45        |
|                                            | <i>Cupressus sempervirens</i>     |                                        | <b>1.02</b>     | 84.35                                | 44.17       |
|                                            | <i>Elettaria cardamomum</i>       |                                        | <b>0.00</b>     | 81.04                                | 4054.85     |
|                                            | <i>Foeniculum vulgare</i>         |                                        | 84.26           | 87.37                                | 3.34        |
| <i>Juniperus virginiana</i><br>(cederwood) | <i>Cinnamomum zeylanicum</i>      | <b>15.47</b>                           | 98.49           | 91.95                                | 80.47       |
|                                            | <i>Citrus bergamia</i>            |                                        | <b>1.22</b>     | 91.07                                | 116.60      |
|                                            | <i>Citrus limon</i>               |                                        | <b>1.75</b>     | 88.74                                | 102.56      |
|                                            | <i>Commiphora molmol</i>          |                                        | <b>1.03</b>     | 82.90                                | 112.47      |
|                                            | <i>Cymbopogon citratus</i>        |                                        | 100.00          | 91.00                                | 79.64       |
|                                            | <i>Lavandula angustifolia</i>     |                                        | <b>9.59</b>     | 87.56                                | 80.76       |
|                                            | <i>Mentha piperita</i>            |                                        | <b>6.98</b>     | 85.40                                | 80.43       |
|                                            | <i>Origanum vulgare</i>           |                                        | 99.67           | 86.16                                | 75.41       |
|                                            | <i>Pinus sylvestris</i>           |                                        | <b>1.04</b>     | 57.46                                | 77.66       |
|                                            | <i>Rosa damascena</i>             |                                        | 97.32           | 72.90                                | 63.81       |
|                                            | <i>Rosmarinus officinalis</i>     |                                        | <b>0.71</b>     | 79.57                                | 125.53      |
|                                            | <i>Santalum austrocaledonicum</i> |                                        | 99.22           | 83.54                                | 73.11       |
|                                            | <i>Styrax benzoin</i>             |                                        | <b>2.47</b>     | 93.60                                | 100.38      |
|                                            | <i>Thymus vulgaris</i>            |                                        | 97.76           | 68.89                                | 60.30       |
|                                            | <i>Zingiber officinale</i>        |                                        | <b>0.19</b>     | 82.73                                | 287.92      |
| <i>Laurus nobilis</i><br>(bay)             | <i>Citrus limon</i>               | <b>3.04</b>                            | <b>1.75</b>     | <b>1.57</b>                          | 0.71        |
|                                            | <i>Citrus sinensis</i>            |                                        | <b>0.96</b>     | <b>30.80</b>                         | 21.20       |
|                                            | <i>Coriandrum sativum</i>         |                                        | <b>11.95</b>    | 72.42                                | 14.95       |
|                                            | <i>Eucalyptus globulus</i>        |                                        | <b>4.21</b>     | <b>17.86</b>                         | 5.06        |
|                                            | <i>Juniperus virginiana</i>       |                                        | <b>0.57</b>     | 82.71                                | 85.58       |
|                                            | <i>Lavandula angustifolia</i>     |                                        | <b>9.59</b>     | <b>23.30</b>                         | 5.05        |
|                                            | <i>Origanum vulgare</i>           |                                        | 99.67           | <b>9.33</b>                          | 1.58        |
|                                            | <i>Rosmarinus officinalis</i>     |                                        | <b>0.71</b>     | <b>3.63</b>                          | 3.17        |
|                                            | <i>Salvia officinalis</i>         |                                        | <b>0.82</b>     | <b>10.45</b>                         | 8.11        |
|                                            | <i>Thymus vulgaris</i>            |                                        | 97.76           | <b>7.61</b>                          | 1.29        |
|                                            | <i>Zingiber officinale</i>        |                                        | <b>0.19</b>     | <b>23.00</b>                         | 63.82       |

| Essential oil combinations                  |                                   | Individual brine-shrimp mortality (%)* |                 | Combined brine-shrimp mortality (%)* | ΣFIC**      |
|---------------------------------------------|-----------------------------------|----------------------------------------|-----------------|--------------------------------------|-------------|
| Essential oil 1                             | Essential oil 2                   | Essential oil 1                        | Essential oil 2 |                                      |             |
| <i>Lavandula angustifolia</i><br>(lavender) | <i>Citrus aurantifolia</i>        | <b>9.59</b>                            | <b>0.36</b>     | <b>33.87</b>                         | 48.51       |
|                                             | <i>Citrus limon</i>               |                                        | <b>1.75</b>     | <b>1.83</b>                          | 0.62        |
|                                             | <i>Citrus sinensis</i>            |                                        | <b>0.96</b>     | <b>3.94</b>                          | 2.27        |
|                                             | <i>Commiphora molmol</i>          |                                        | <b>1.03</b>     | 81.68                                | 44.00       |
|                                             | <i>Melaleuca alternifolia</i>     |                                        | <b>1.07</b>     | <b>4.31</b>                          | 2.23        |
|                                             | <i>Melaleuca viridiflora</i>      |                                        | <b>4.14</b>     | 70.66                                | 12.21       |
|                                             | <i>Origanum vulgare</i>           |                                        | 99.67           | <b>16.43</b>                         | 0.94        |
|                                             | <i>Pimenta racemosa</i>           |                                        | 100.00          | <b>5.90</b>                          | <b>0.34</b> |
|                                             | <i>Pinus sylvestris</i>           |                                        | <b>1.04</b>     | <b>33.47</b>                         | 17.86       |
|                                             | <i>Rosmarinus officinalis</i>     |                                        | <b>0.71</b>     | <b>9.18</b>                          | 6.98        |
|                                             | <i>Thymus vulgaris</i>            |                                        | 97.76           | 76.90                                | 4.40        |
| <i>Lavandula burnati</i><br>(lavandin)      | <i>Citrus limon</i>               | <b>0.16</b>                            | <b>1.75</b>     | <b>16.51</b>                         | 57.72       |
|                                             | <i>Citrus sinensis</i>            |                                        | <b>0.96</b>     | <b>4.31</b>                          | 16.09       |
| <i>Lavandula spica</i><br>(lavender spike)  | <i>Citrus limon</i>               | <b>1.01</b>                            | <b>1.75</b>     | <b>23.46</b>                         | 18.33       |
|                                             | <i>Citrus sinensis</i>            |                                        | <b>0.96</b>     | <b>9.08</b>                          | 9.26        |
| <i>Melaleuca cajuputii</i><br>(cajeput)     | <i>Citrus bergamia</i>            | <b>0.60</b>                            | <b>1.22</b>     | 91.44                                | 114.15      |
|                                             | <i>Citrus limon</i>               |                                        | <b>1.75</b>     | 93.11                                | 104.62      |
|                                             | <i>Elettaria cardamomum</i>       |                                        | <b>0.00</b>     | 85.40                                | 4341.77     |
|                                             | <i>Eucalyptus globulus</i>        |                                        | <b>4.21</b>     | 90.75                                | 86.84       |
|                                             | <i>Helichrysum italicum</i>       |                                        | <b>9.50</b>     | 95.79                                | 85.32       |
|                                             | <i>Hyssopus officinalis</i>       |                                        | <b>6.65</b>     | 72.00                                | 65.76       |
|                                             | <i>Lavandula angustifolia</i>     |                                        | <b>9.59</b>     | 86.64                                | 77.13       |
|                                             | <i>Melaleuca viridiflora</i>      |                                        | <b>4.14</b>     | 80.45                                | 77.14       |
|                                             | <i>Myrtus communis</i>            |                                        | <b>0.00</b>     | 65.54                                | 3331.96     |
|                                             | <i>Pinus sylvestris</i>           |                                        | <b>1.04</b>     | 76.83                                | 101.38      |
|                                             | <i>Rosa damascena</i>             |                                        | 97.32           | 79.58                                | 67.11       |
|                                             | <i>Rosmarinus officinalis</i>     |                                        | <b>0.71</b>     | 73.56                                | 113.70      |
|                                             | <i>Santalum austrocaledonicum</i> |                                        | 99.22           | 83.29                                | 70.22       |
|                                             | <i>Syzygium caryophyllata</i>     |                                        | 99.57           | 83.06                                | 70.03       |
|                                             | <i>Thymus vulgaris</i>            |                                        | 97.76           | 74.27                                | 62.63       |
|                                             | <i>Zingiber officinale</i>        |                                        | <b>0.19</b>     | 89.62                                | 309.00      |
| <i>Melaleuca viridiflora</i><br>(niaouli)   | <i>Citrus sinensis</i>            | <b>4.14</b>                            | <b>0.96</b>     | 76.26                                | 49.13       |
|                                             | <i>Mentha piperita</i>            |                                        | <b>6.98</b>     | <b>28.43</b>                         | 5.47        |
|                                             | <i>Pinus sylvestris</i>           |                                        | <b>1.04</b>     | 83.30                                | 50.16       |
|                                             | <i>Rosmarinus officinalis</i>     |                                        | <b>0.71</b>     | 92.88                                | 76.93       |
|                                             | <i>Salvia officinalis</i>         |                                        | <b>0.82</b>     | 66.79                                | 48.93       |
| <i>Mentha piperita</i><br>(peppermint)      | <i>Rosmarinus officinalis</i>     | <b>6.98</b>                            | <b>0.71</b>     | <b>31.37</b>                         | 24.45       |
|                                             | <i>Santalum austrocaledonicum</i> |                                        | 99.22           | 55.42                                | 4.25        |
|                                             | <i>Thymus vulgaris</i>            |                                        | 97.76           | 77.57                                | 5.96        |

| Essential oil combinations              |                                   | Individual brine-shrimp mortality (%)* |                 | Combined brine-shrimp mortality (%)* | ΣFIC**  |
|-----------------------------------------|-----------------------------------|----------------------------------------|-----------------|--------------------------------------|---------|
| Essential oil 1                         | Essential oil 2                   | Essential oil 1                        | Essential oil 2 |                                      |         |
| <i>Myrtus communis</i><br>(myrtle)      | <i>Melaleuca alternifolia</i>     | <b>0.00</b>                            | <b>1.07</b>     | <b>28.33</b>                         | 1429.46 |
|                                         | <i>Mentha piperita</i>            |                                        | <b>6.98</b>     | 59.98                                | 3003.31 |
|                                         | <i>Rosmarinus officinalis</i>     |                                        | <b>0.71</b>     | 84.74                                | 4296.85 |
|                                         | <i>Thymus vulgaris</i>            |                                        | 97.76           | 78.91                                | 3945.90 |
| <i>Ocimum basilicum</i><br>(basil)      | <i>Citrus aurantifolia</i>        | <b>13.04</b>                           | <b>0.36</b>     | <b>21.29</b>                         | 30.19   |
|                                         | <i>Citrus bergamia</i>            |                                        | <b>1.22</b>     | 76.68                                | 34.40   |
|                                         | <i>Cymbopogon citratus</i>        |                                        | 100.00          | <b>49.36</b>                         | 2.14    |
|                                         | <i>Eucalyptus globulus</i>        |                                        | <b>4.21</b>     | <b>20.75</b>                         | 3.26    |
|                                         | <i>Hyssopus officinalis</i>       |                                        | <b>6.65</b>     | <b>19.61</b>                         | 2.23    |
|                                         | <i>Juniperus virginiana</i>       |                                        | <b>0.57</b>     | 78.30                                | 71.13   |
|                                         | <i>Lavandula angustifolia</i>     |                                        | <b>9.59</b>     | <b>9.33</b>                          | 0.84    |
|                                         | <i>Melaleuca alternifolia</i>     |                                        | <b>1.07</b>     | <b>39.69</b>                         | 19.99   |
|                                         | <i>Melaleuca viridiflora</i>      |                                        | <b>4.14</b>     | <b>20.05</b>                         | 3.18    |
|                                         | <i>Origanum vulgare</i>           |                                        | 99.67           | <b>18.69</b>                         | 0.81    |
|                                         | <i>Origanum vulgare</i>           |                                        | 99.67           | 76.71                                | 3.33    |
|                                         | <i>Piper nigrum</i>               |                                        | <b>1.32</b>     | 73.80                                | 30.79   |
|                                         | <i>Rosmarinus officinalis</i>     |                                        | <b>0.71</b>     | <b>25.06</b>                         | 18.69   |
|                                         | <i>Salvia officinalis</i>         |                                        | <b>0.82</b>     | 64.04                                | 41.63   |
|                                         | <i>Santalum austrocaledonicum</i> |                                        | 99.22           | 70.14                                | 3.04    |
| <i>Origanum marjorana</i><br>(marjoram) | <i>Citrus sinensis</i>            | <b>0.34</b>                            | <b>0.96</b>     | <b>4.74</b>                          | 9.51    |
|                                         | <i>Melaleuca alternifolia</i>     |                                        | <b>1.07</b>     | <b>6.03</b>                          | 11.76   |
|                                         | <i>Rosmarinus officinalis</i>     |                                        | <b>0.71</b>     | <b>2.15</b>                          | 4.72    |
|                                         | <i>Santalum austrocaledonicum</i> |                                        | 99.22           | 57.37                                | 85.49   |
| <i>Origanum vulgare</i><br>(origanum)   | <i>Melaleuca alternifolia</i>     | 99.67                                  | <b>1.07</b>     | <b>7.75</b>                          | 3.65    |
|                                         | <i>Pinus sylvestris</i>           |                                        | <b>1.04</b>     | <b>9.14</b>                          | 4.44    |
|                                         | <i>Rosmarinus officinalis</i>     |                                        | <b>0.71</b>     | <b>3.59</b>                          | 2.56    |
| <i>Pinus sylvestris</i><br>(pine)       | <i>Melaleuca alternifolia</i>     |                                        | <b>1.07</b>     | <b>26.91</b>                         | 25.48   |
|                                         | <i>Pimenta racemosa</i>           |                                        | 100.00          | 87.51                                | 42.57   |
|                                         | <i>Rosmarinus officinalis</i>     |                                        | <b>0.71</b>     | <b>42.28</b>                         | 50.27   |
|                                         | <i>Santalum austrocaledonicum</i> |                                        | 99.22           | <b>49.86</b>                         | 24.26   |
|                                         | <i>Thymus vulgaris</i>            |                                        | 97.76           | 79.10                                | 38.48   |
| <i>Piper nigrum</i><br>(black pepper)   | <i>Citrus aurantifolia</i>        | <b>1.04</b>                            | <b>0.36</b>     | 85.67                                | 150.68  |
|                                         | <i>Citrus bergamia</i>            |                                        | <b>1.22</b>     | 92.87                                | 73.28   |
|                                         | <i>Citrus limon</i>               |                                        | <b>1.75</b>     | 60.73                                | 40.35   |
|                                         | <i>Citrus sinensis</i>            |                                        | <b>0.96</b>     | 86.01                                | 77.62   |
|                                         | <i>Cupressus sempervirens</i>     |                                        | <b>1.02</b>     | 91.71                                | 79.79   |
|                                         | <i>Juniperus virginiana</i>       |                                        | <b>0.57</b>     | 90.35                                | 112.85  |
|                                         | <i>Lavandula angustifolia</i>     |                                        | <b>9.59</b>     | 88.34                                | 38.07   |
|                                         | <i>Origanum vulgare</i>           |                                        | 99.67           | 74.70                                | 28.67   |



| Essential oil combinations                     |                                   | Individual brine-shrimp mortality (%)* |                 | Combined brine-shrimp mortality (%)* | ΣFIC**      |
|------------------------------------------------|-----------------------------------|----------------------------------------|-----------------|--------------------------------------|-------------|
| Essential oil 1                                | Essential oil 2                   | Essential oil 1                        | Essential oil 2 |                                      |             |
|                                                | <i>Rosmarinus officinalis</i>     |                                        | <b>0.71</b>     | 71.51                                | 77.69       |
|                                                | <i>Santalum austrocaledonicum</i> |                                        | 99.22           | 85.25                                | 32.73       |
|                                                | <i>Styrax benzoin</i>             |                                        | <b>2.47</b>     | <b>1.18</b>                          | 0.69        |
|                                                | <i>Thymus vulgaris</i>            |                                        | 97.76           | 94.59                                | 36.32       |
| <i>Rosa damascena</i> (rose)                   | <i>Santalum austrocaledonicum</i> | 97.32                                  | 99.22           | 75.38                                | 0.77        |
| <i>Rosmarinus officinalis</i> (rosemary)       | <i>Melaleuca alternifolia</i>     | <b>0.71</b>                            | <b>1.07</b>     | 71.03                                | 83.30       |
| <i>Salvia officinalis</i> (sage)               | <i>Melaleuca alternifolia</i>     | <b>0.82</b>                            | <b>1.07</b>     | 53.28                                | 57.38       |
|                                                | <i>Santalum austrocaledonicum</i> |                                        | 99.22           | 78.42                                | 48.38       |
|                                                | <i>Thymus vulgaris</i>            |                                        | 97.76           | 84.26                                | 51.98       |
| <i>Salvia sclarea</i> (clary sage)             | <i>Boswellia carterii</i>         | <b>0.20</b>                            | <b>1.39</b>     | <b>18.34</b>                         | 51.42       |
|                                                | <i>Citrus aurantifolia</i>        |                                        | <b>0.36</b>     | <b>20.93</b>                         | 80.06       |
|                                                | <i>Citrus bergamia</i>            |                                        | <b>1.22</b>     | <b>44.88</b>                         | 128.15      |
|                                                | <i>Juniperus virginiana</i>       |                                        | <b>0.57</b>     | 56.47                                | 187.20      |
|                                                | <i>Lavandula angustifolia</i>     |                                        | <b>9.59</b>     | <b>15.76</b>                         | 39.36       |
|                                                | <i>Lavandula burnati</i>          |                                        | <b>0.16</b>     | <b>49.47</b>                         | 279.78      |
|                                                | <i>Rosa damascena</i>             |                                        | 97.32           | <b>9.63</b>                          | 23.59       |
|                                                | <i>Tagetes minuta</i>             |                                        | <b>1.30</b>     | <b>12.64</b>                         | 35.77       |
| <i>Santalum austrocaledonicum</i> (sandalwood) | <i>Melaleuca alternifolia</i>     | 99.22                                  | <b>1.07</b>     | 72.83                                | 34.25       |
| <i>Styrax benzoin</i> (benzoin)                | <i>Boswellia carterii</i>         | <b>2.47</b>                            | <b>1.39</b>     | <b>3.87</b>                          | 2.18        |
|                                                | <i>Citrus bergamia</i>            |                                        | <b>1.22</b>     | 98.19                                | 60.15       |
|                                                | <i>Citrus limon</i>               |                                        | <b>1.75</b>     | <b>24.97</b>                         | 12.18       |
|                                                | <i>Citrus sinensis</i>            |                                        | <b>0.96</b>     | <b>19.61</b>                         | 14.23       |
|                                                | <i>Commiphora molmol</i>          |                                        | <b>1.03</b>     | <b>16.41</b>                         | 11.30       |
|                                                | <i>Coriandrum sativum</i>         |                                        | <b>11.95</b>    | 80.90                                | 19.75       |
|                                                | <i>Cupressus sempervirens</i>     |                                        | <b>1.02</b>     | <b>6.48</b>                          | 4.50        |
|                                                | <i>Lavandula angustifolia</i>     |                                        | <b>9.59</b>     | <b>24.32</b>                         | 6.19        |
|                                                | <i>Mentha piperita</i>            |                                        | <b>6.98</b>     | <b>44.80</b>                         | 12.28       |
|                                                | <i>Rosa damascena</i>             |                                        | 97.32           | <b>14.07</b>                         | 2.92        |
|                                                | <i>Santalum austrocaledonicum</i> |                                        | 99.22           | <b>5.45</b>                          | 1.13        |
| <i>Syzygium caryophyllata</i> (clove)          | <i>Cinnamonum zeylanicum</i>      | 99.57                                  | 98.49           | <b>3.31</b>                          | <b>0.03</b> |
|                                                | <i>Citrus bergamia</i>            |                                        | <b>1.22</b>     | <b>3.11</b>                          | 1.29        |
|                                                | <i>Citrus limon</i>               |                                        | <b>1.75</b>     | <b>3.66</b>                          | 1.06        |
|                                                | <i>Citrus sinensis</i>            |                                        | <b>0.96</b>     | <b>6.58</b>                          | 3.48        |
|                                                | <i>Commiphora molmol</i>          |                                        | <b>1.03</b>     | <b>5.88</b>                          | 2.89        |
|                                                | <i>Cymbopogon citratus</i>        |                                        | 100.00          | <b>5.03</b>                          | <b>0.05</b> |
|                                                | <i>Eucalyptus globulus</i>        |                                        | <b>4.21</b>     | <b>3.52</b>                          | <b>0.44</b> |
|                                                | <i>Juniperus virginiana</i>       |                                        | <b>0.57</b>     | <b>4.47</b>                          | 3.91        |
|                                                | <i>Lavandula angustifolia</i>     |                                        | <b>9.59</b>     | <b>2.30</b>                          | <b>0.13</b> |

| Essential oil combinations              |                                   | Individual brine-shrimp mortality (%)* |                 | Combined brine-shrimp mortality (%)* | ΣFIC**      |
|-----------------------------------------|-----------------------------------|----------------------------------------|-----------------|--------------------------------------|-------------|
| Essential oil 1                         | Essential oil 2                   | Essential oil 1                        | Essential oil 2 |                                      |             |
| <i>Thymus vulgaris</i> (thyme)          | <i>Melaleuca alternifolia</i>     |                                        | <b>1.07</b>     | <b>3.29</b>                          | 1.55        |
|                                         | <i>Mentha piperita</i>            |                                        | <b>6.98</b>     | <b>3.06</b>                          | <b>0.23</b> |
|                                         | <i>Ocimum basilicum</i>           |                                        | <b>13.04</b>    | <b>4.99</b>                          | <b>0.22</b> |
|                                         | <i>Pinus sylvestris</i>           |                                        | <b>1.04</b>     | <b>2.23</b>                          | 1.08        |
|                                         | <i>Piper nigrum</i>               |                                        | <b>1.32</b>     | <b>3.67</b>                          | 1.41        |
|                                         | <i>Rosmarinus officinalis</i>     |                                        | <b>0.71</b>     | <b>3.44</b>                          | 2.45        |
|                                         | <i>Styrax benzoin</i>             |                                        | <b>2.47</b>     | <b>7.15</b>                          | 1.48        |
|                                         | <i>Thymus vulgaris</i>            |                                        | 97.76           | <b>2.93</b>                          | <b>0.03</b> |
|                                         | <i>Zingiber officinale</i>        |                                        | <b>0.19</b>     | <b>3.54</b>                          | 9.26        |
| <i>Thymus vulgaris</i> (thyme)          | <i>Melaleuca alternifolia</i>     | 97.76                                  | <b>1.07</b>     | 79.14                                | 37.22       |
| <i>Zingiber officinale</i> (ginger)     | <i>Citrus limon</i>               |                                        | <b>1.75</b>     | <b>25.16</b>                         | 72.84       |
|                                         | <i>Citrus sinensis</i>            |                                        | <b>0.96</b>     | <b>16.20</b>                         | 50.77       |
|                                         | <i>Commiphora molmol</i>          |                                        | <b>1.03</b>     | <b>26.31</b>                         | 81.47       |
|                                         | <i>Cymbopogon citratus</i>        |                                        | 100.00          | 83.94                                | 219.50      |
|                                         | <i>Melaleuca alternifolia</i>     |                                        | <b>1.07</b>     | <b>29.10</b>                         | 89.50       |
|                                         | <i>Mentha piperita</i>            | <b>0.19</b>                            | <b>6.98</b>     | <b>40.00</b>                         | 107.30      |
|                                         | <i>Pimenta racemosa</i>           |                                        | 100.00          | 89.41                                | 233.80      |
|                                         | <i>Rosmarinus officinalis</i>     |                                        | <b>0.71</b>     | <b>26.18</b>                         | 86.87       |
|                                         | <i>Salvia officinalis</i>         |                                        | <b>0.82</b>     | 82.65                                | 266.29      |
|                                         | <i>Santalum austrocaledonicum</i> |                                        | 99.22           | 91.79                                | 240.04      |
|                                         | <i>Thymus vulgaris</i>            |                                        | 97.76           | <b>9.06</b>                          | 23.69       |
| Positive control (Potassium dichromate) |                                   |                                        | 99.95           |                                      |             |
| Negative control (Sea water)            |                                   |                                        | 0.00            |                                      |             |

**Brine-shrimp viability (%)**\* in bold denotes non-toxic effect (% mortality less than 50%); **ΣFIC\*\*** in bold denotes synergistic effect (ΣFIC less than or equal to 0.50) and ΣFIC in italics denotes additive effect (ΣFIC greater than 0.50 and less than or equal to 1.00).
